# Supplementary material
Source: PubMed Central journal article supplement (PMC3408221)
Supplement: NIHMS171319-supplement-01.pdf [file NIHMS171319-supplement-01.pdf]

# Synthesis of C-Glycoside Analogues of $\beta$ -Galactosamine-(1->4)-3-O-Methyl-D-Chiro-Inositol and Assay as Activator of Protein Phosphatases PDHP and PP2C $\alpha$

Sunej K. Hans <sup>a</sup>, Fatoumata Camara <sup>a</sup>, Ahmad Altiti <sup>a</sup>, Alejandro Martin-Montalvo Sanchez <sup>c</sup>, David L. Brautigam <sup>d</sup>, Douglas Heimark <sup>b</sup>, Joseph Larner <sup>b</sup>, Scott Grindrod <sup>e</sup>, Milton L. Brown <sup>e</sup> and David R. Mootoo <sup>a\*</sup>

<sup>a</sup> *Department of Chemistry, Hunter College, 695 Park Avenue New York, NY 10065 and The Graduate Center, CUNY, 365 5th Avenue, New York, NY 10016*

<sup>b</sup> *Allomed Pharmaceuticals,,Charlottesville Virginia 22908, Department of Pharmacology, University of Virginia School of Medicine, Charlottesville, Virginia 22908-0735*

<sup>c</sup> *Centro Andaluz de Biología del Desarrollo, Universidad Pablo de Olavide, 41013 Seville, Spain*

<sup>d</sup> *Center for Cell Signaling and Department of Microbiology, University of Virginia School of Medicine, Charlottesville, Virginia 22908*

<sup>e</sup> *Georgetown University Medical Center, Department of Neuroscience, Research Building EP07, 3970 Reservoir Road, Washington, D.C. 20057*

## SUPPORTING INFORMATION

### Table of Contents

|                                                        |    |
|--------------------------------------------------------|----|
| NMR spectra of selected compounds                      | 2  |
| ChemDraw illustrations of ligand-receptor interactions | 22 |
| FlexX scoring tables for ligand-receptor interactions  | 24 |

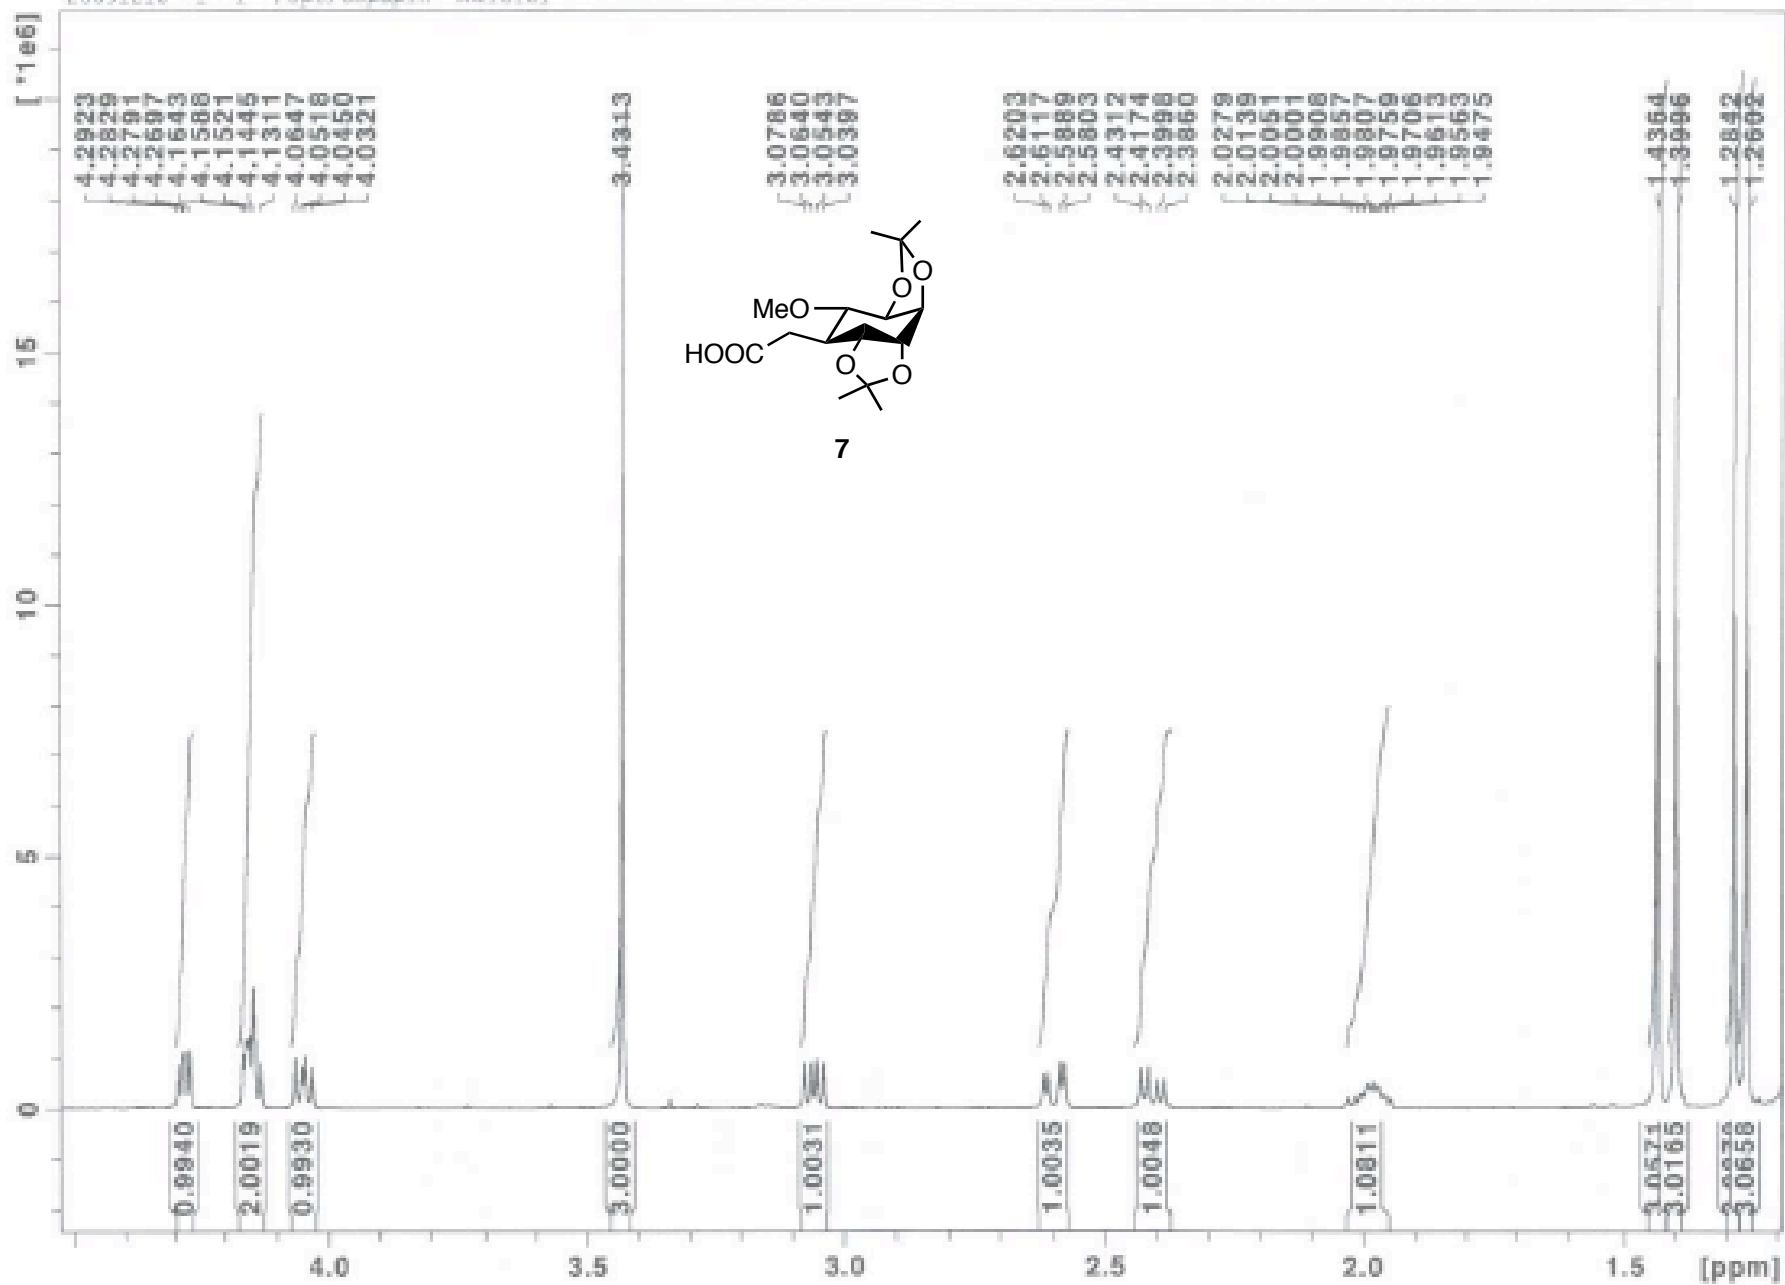

100.000  
103.219  
103.266

80.305  
80.370  
77.274  
77.020  
76.766  
76.706  
76.611  
76.394

59.445

39.722

33.626

27.837  
27.743

25.427  
25.416

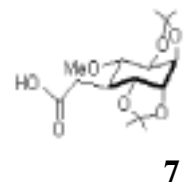

ppm 100 90 80 70 60 50 40 30

20091214 3 1 /opt/topspin saltiti

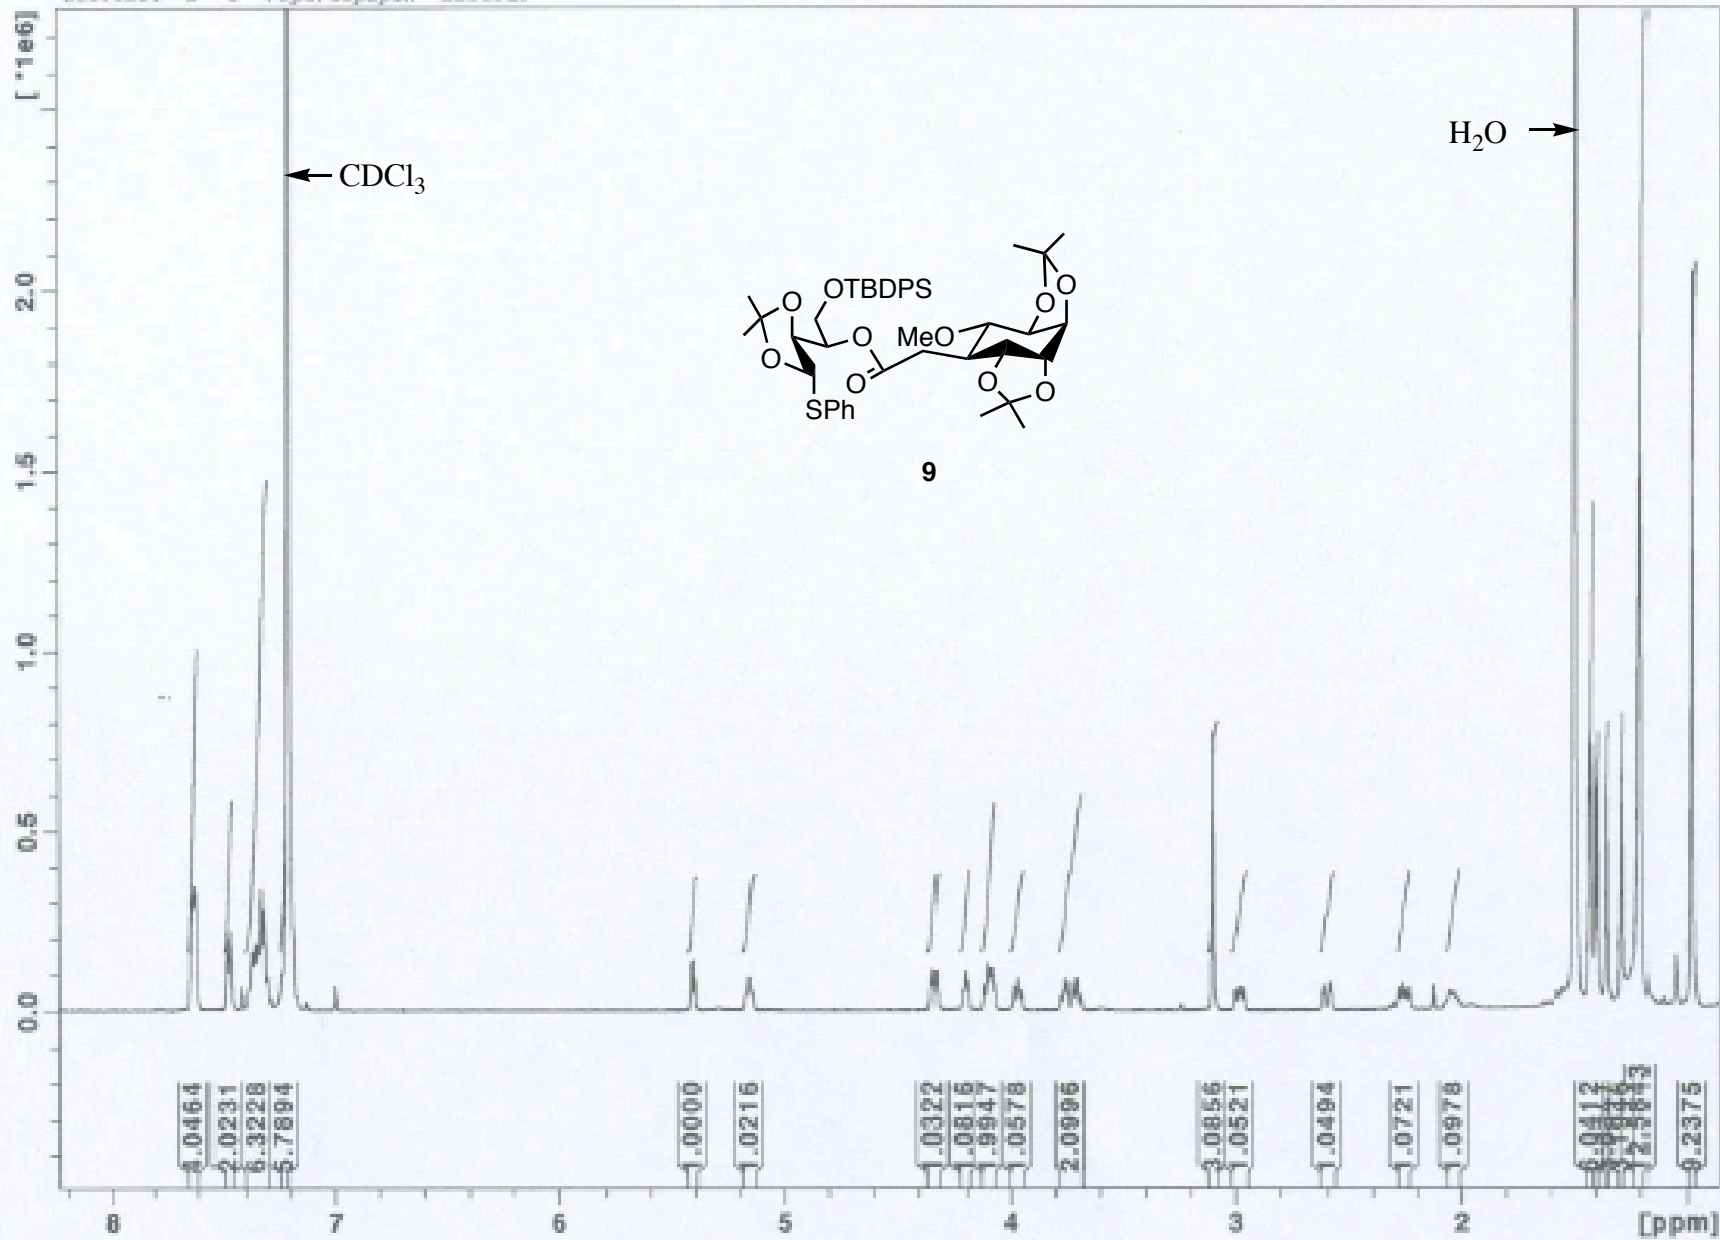

ppm

171.544

135.853  
135.761  
133.662  
133.316  
132.309  
132.491  
129.929  
129.926  
129.109  
127.554  
127.977  
127.881  
111.663  
109.516

64.562  
50.660  
80.597  
79.023  
77.485  
77.231  
75.976  
76.834  
75.699  
70.987  
62.180  
59.165

38.677  
34.642  
28.057  
27.894  
27.664  
26.936  
26.417  
25.007  
25.481  
19.395

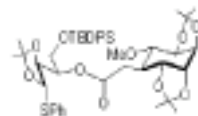

9

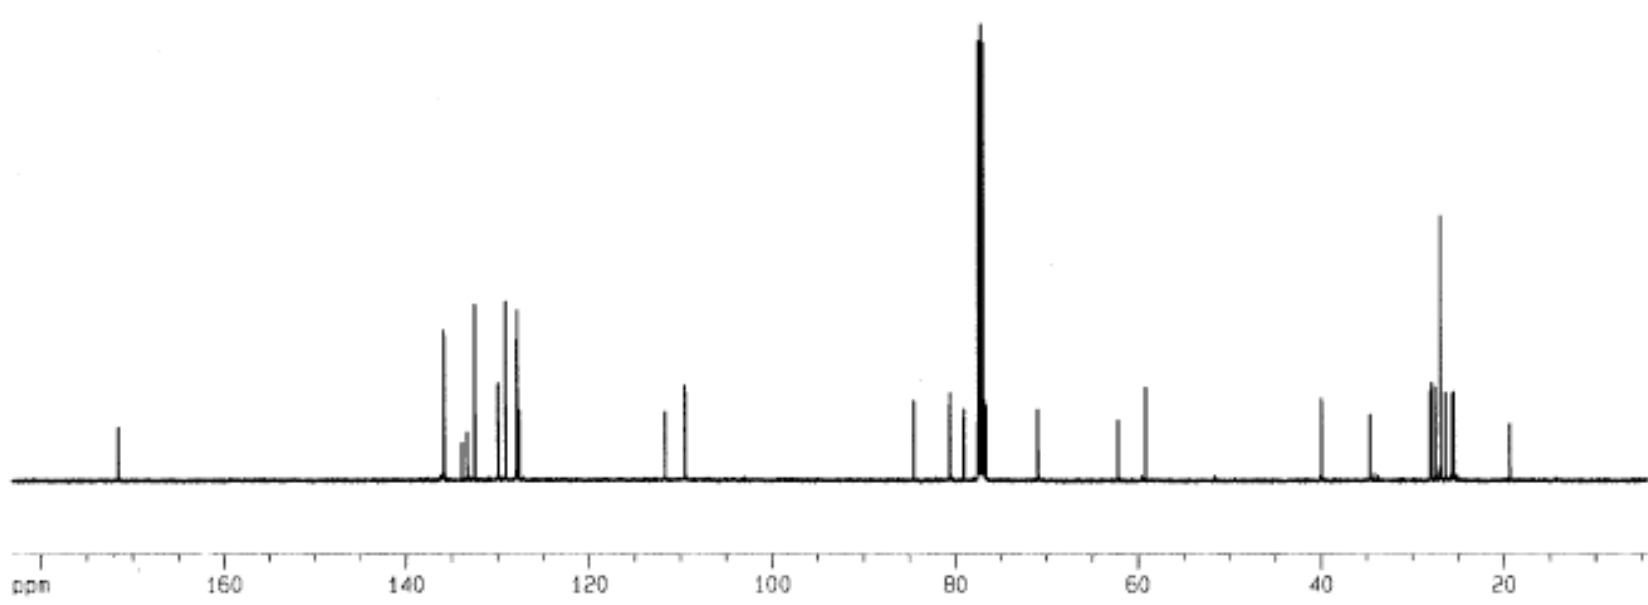

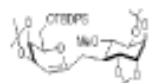

11

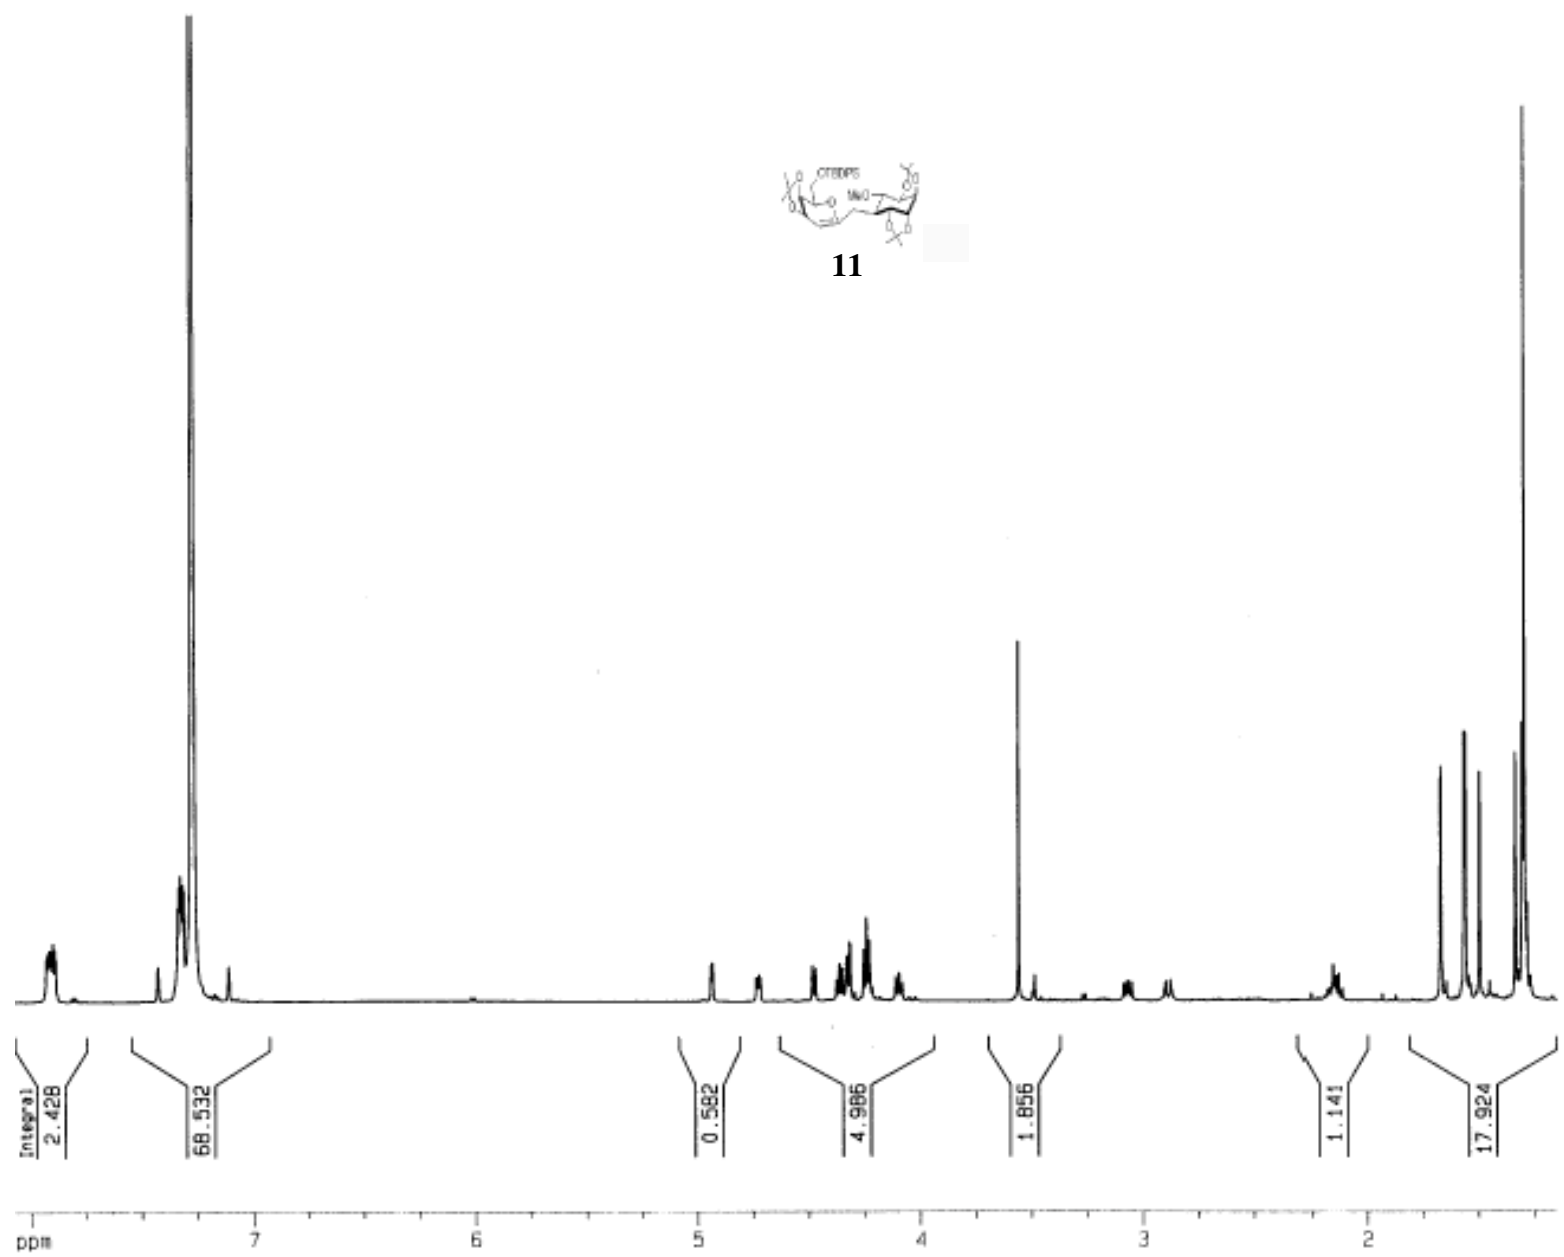

Current Data Parameters  
 NAME 11080601  
 EXPNO 14  
 PROCNO 1

F2 - Acquisition Parameters  
 Date\_ 20061108  
 Time 12.41  
 INSTRUM spect  
 PROBHD 5 mm CPOCH 13C  
 PULPROG zg30  
 TO 32768  
 SOLVENT C6D6  
 NS 8  
 DS 2  
 SWH 8012.820 Hz  
 FIDRES 0.244532 Hz  
 AQ 2.0448356 sec  
 RG 18  
 DW 62.400 usec  
 DE 6.00 usec  
 TE 303.0 K  
 D1 1.0000000 sec  
 MCREST 0.0000000 sec  
 MCMRK 0.0150000 sec

----- CHANNEL f1 -----  
 NUC1 1H  
 P1 9.25 usec  
 PL1 -0.50 dB  
 SF01 500.1330885 MHz

F2 - Processing parameters  
 SI 32768  
 SF 500.1300000 MHz  
 WDW EM  
 SSB 0  
 LB 0.30 Hz  
 GB 0  
 PC 1.00

1D NMR plot parameters  
 CX 22.00 cm  
 CY 85.17 cm  
 F1P 8.073 ppm  
 F1 4037.66 Hz  
 F2P 1.151 ppm  
 F2 575.40 Hz  
 PPMCM 0.31467 ppm/cm  
 HZCM 157.37521 Hz/cm

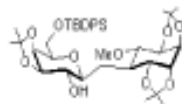

12

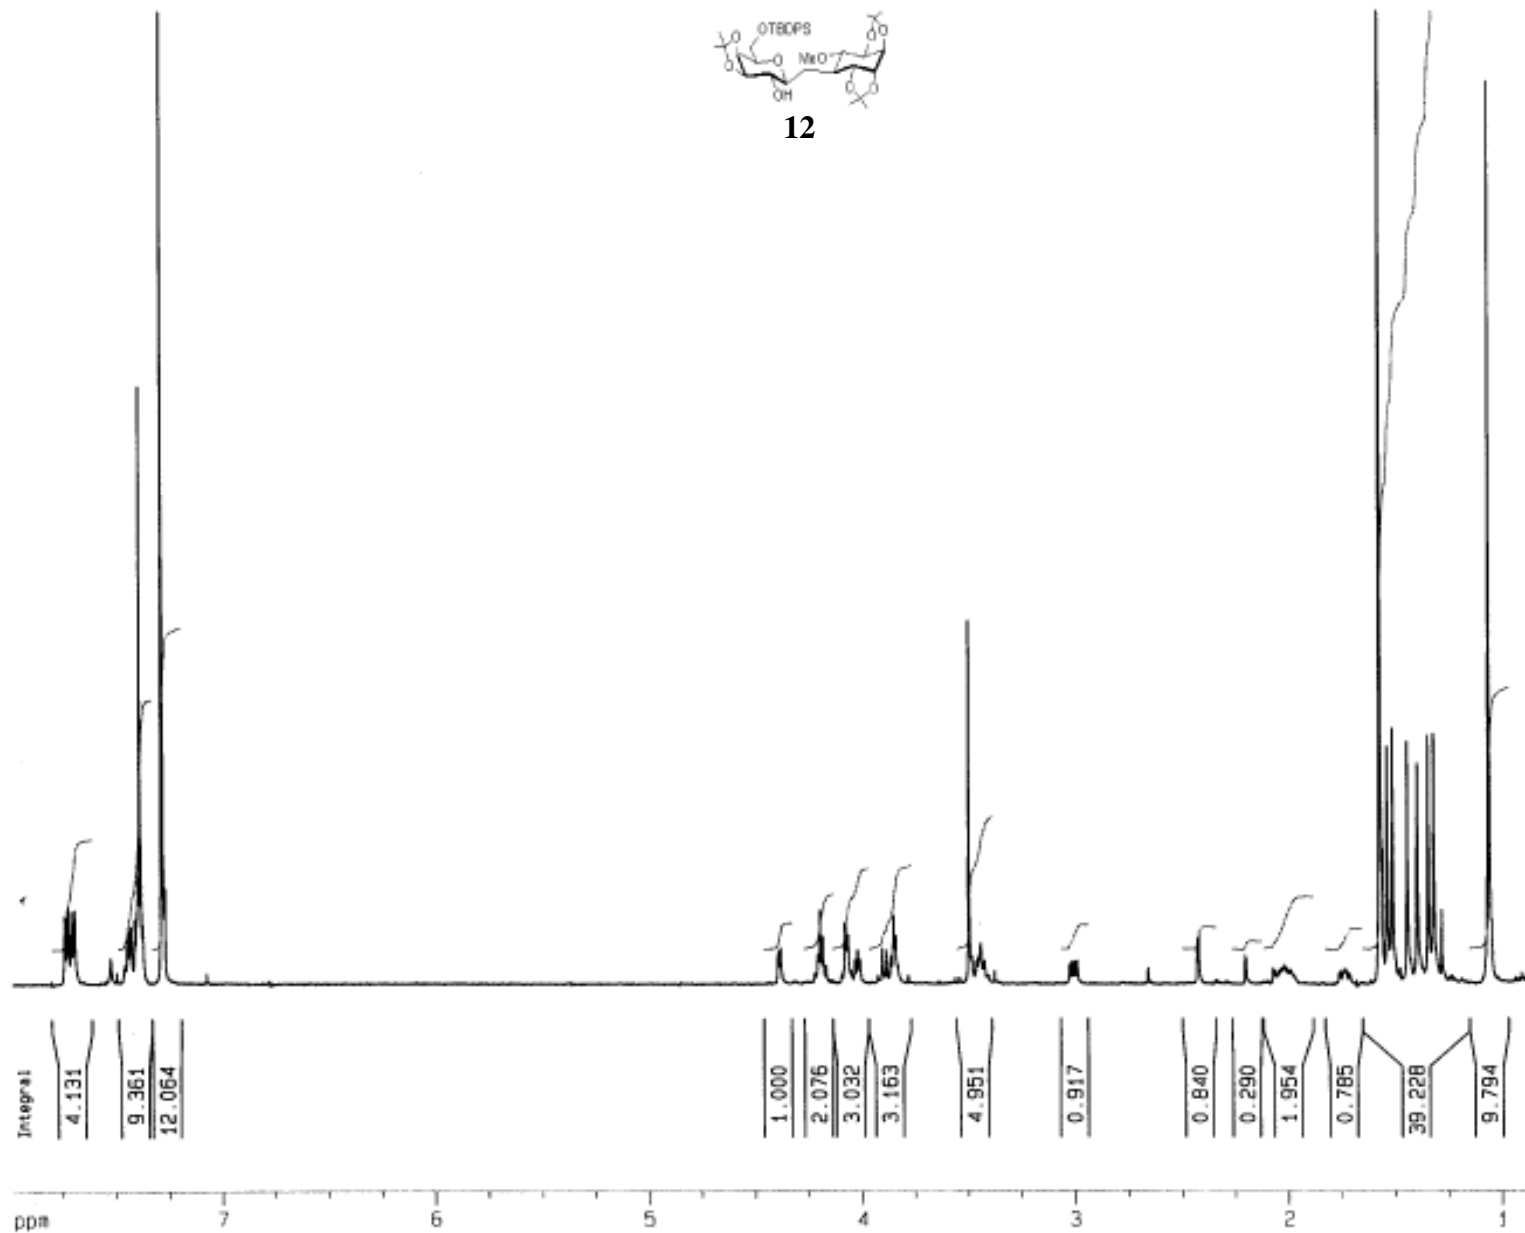

Current Data Parameters

NAME 12040601  
EXPNO 15  
PROCNO 1

F2 - Acquisition Parameters

Date\_ 20061204  
Time 13.32  
INSTRUM spect  
PROBHD 5 mm CPDCH 13C  
PULPROG zg30  
TD 32768  
SOLVENT C6D6  
NS 8  
DS 2  
SMH 8012.820 Hz  
FIDRES 0.244532 Hz  
AQ 2.0448356 sec  
RG 25.4  
DW 62.400 usec  
DE 6.00 usec  
TE 302.9 K  
D1 1.00000000 sec  
MCREST 0.00000000 sec  
MCMRK 0.01500000 sec

----- CHANNEL f1 -----

NUC1 1H  
P1 9.25 usec  
PL1 -0.50 dB  
SF01 500.1330885 MHz

F2 - Processing parameters

S1 32768  
SF 500.1300000 MHz  
WDM EM  
SSB 0  
LB 0.30 Hz  
GB 0  
PC 1.00

1D NMR plot parameters

CX 22.00 cm  
CY 34.48 cm  
F1P 7.984 ppm  
F1 3992.86 Hz  
F2P 0.852 ppm  
F2 425.99 Hz  
PPMCM 0.32418 ppm/cm  
HZCM 162.13031 Hz/cm

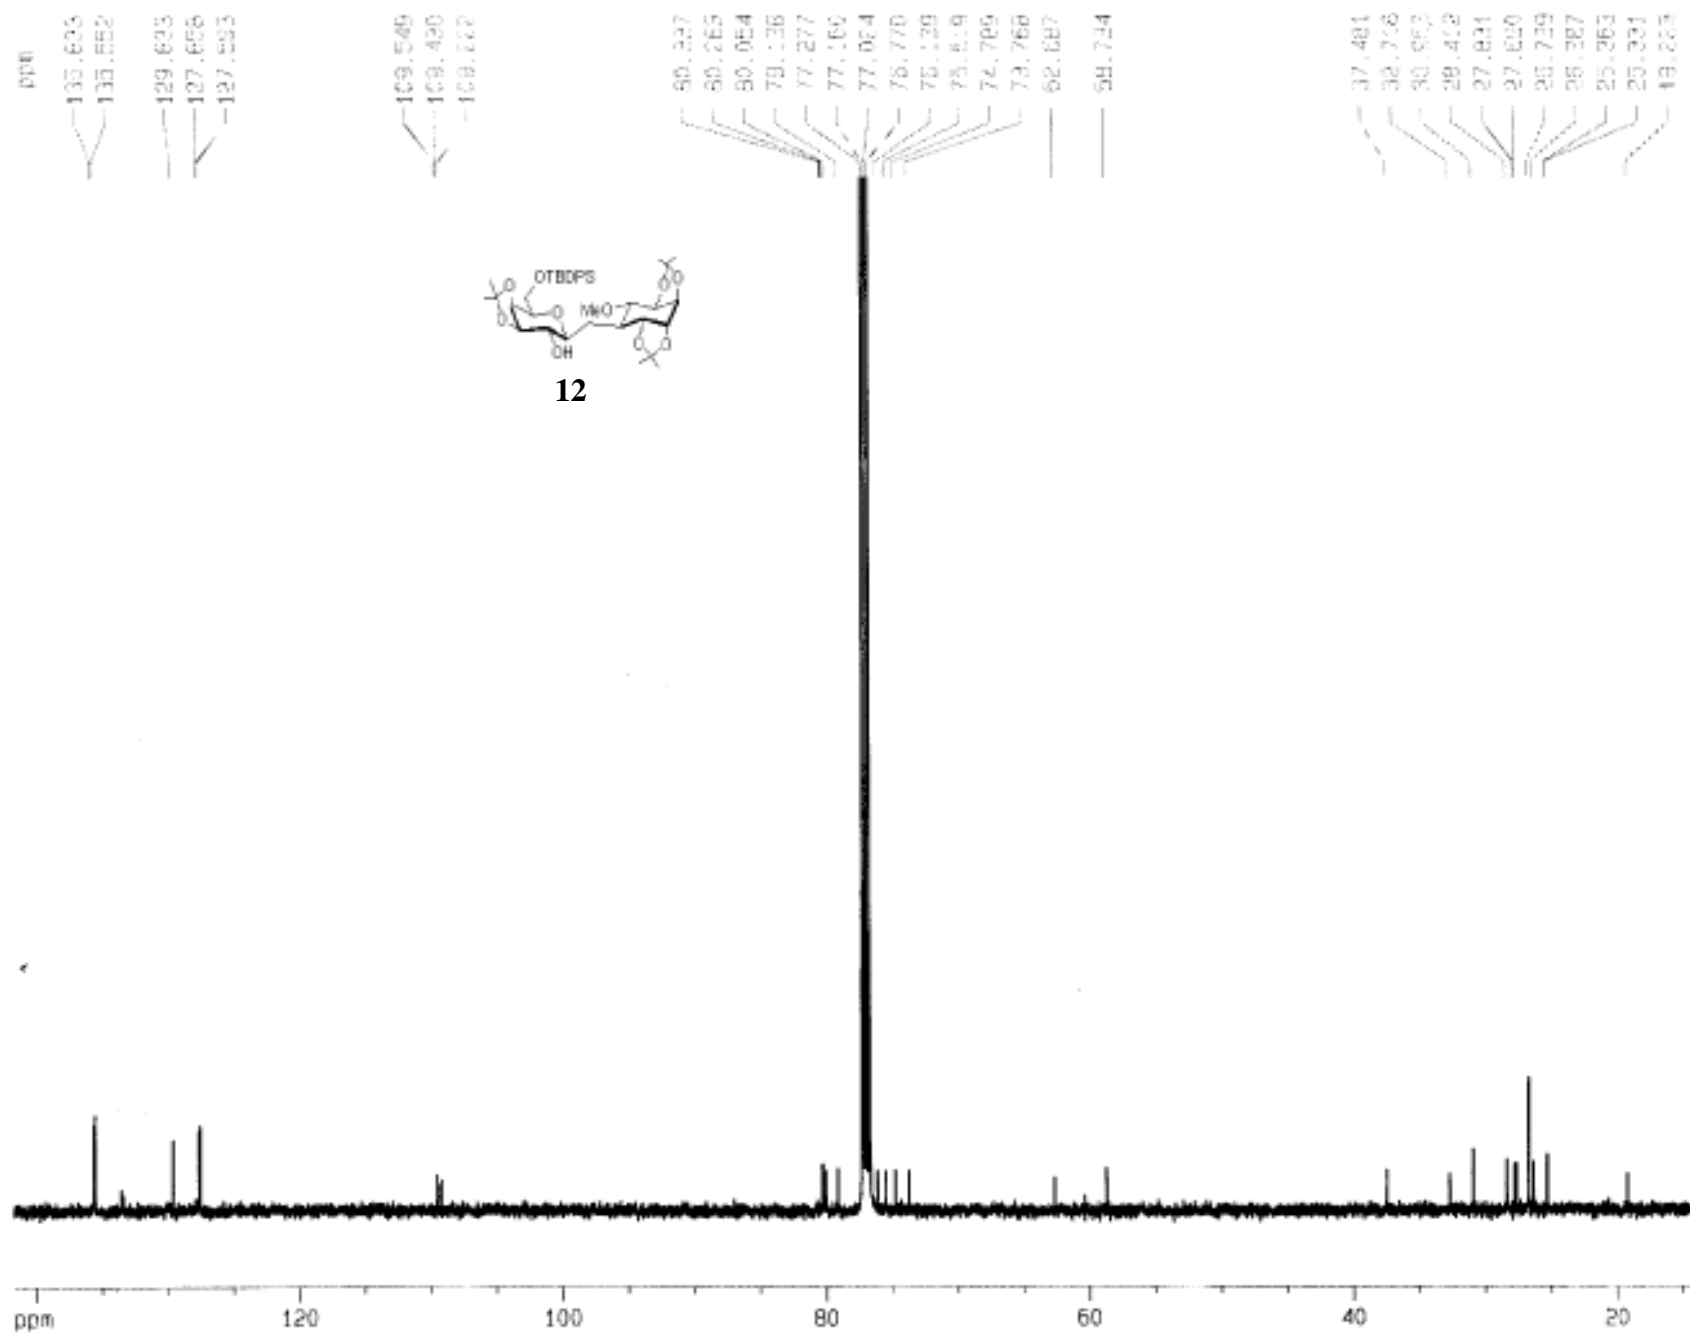

12



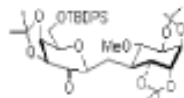

13

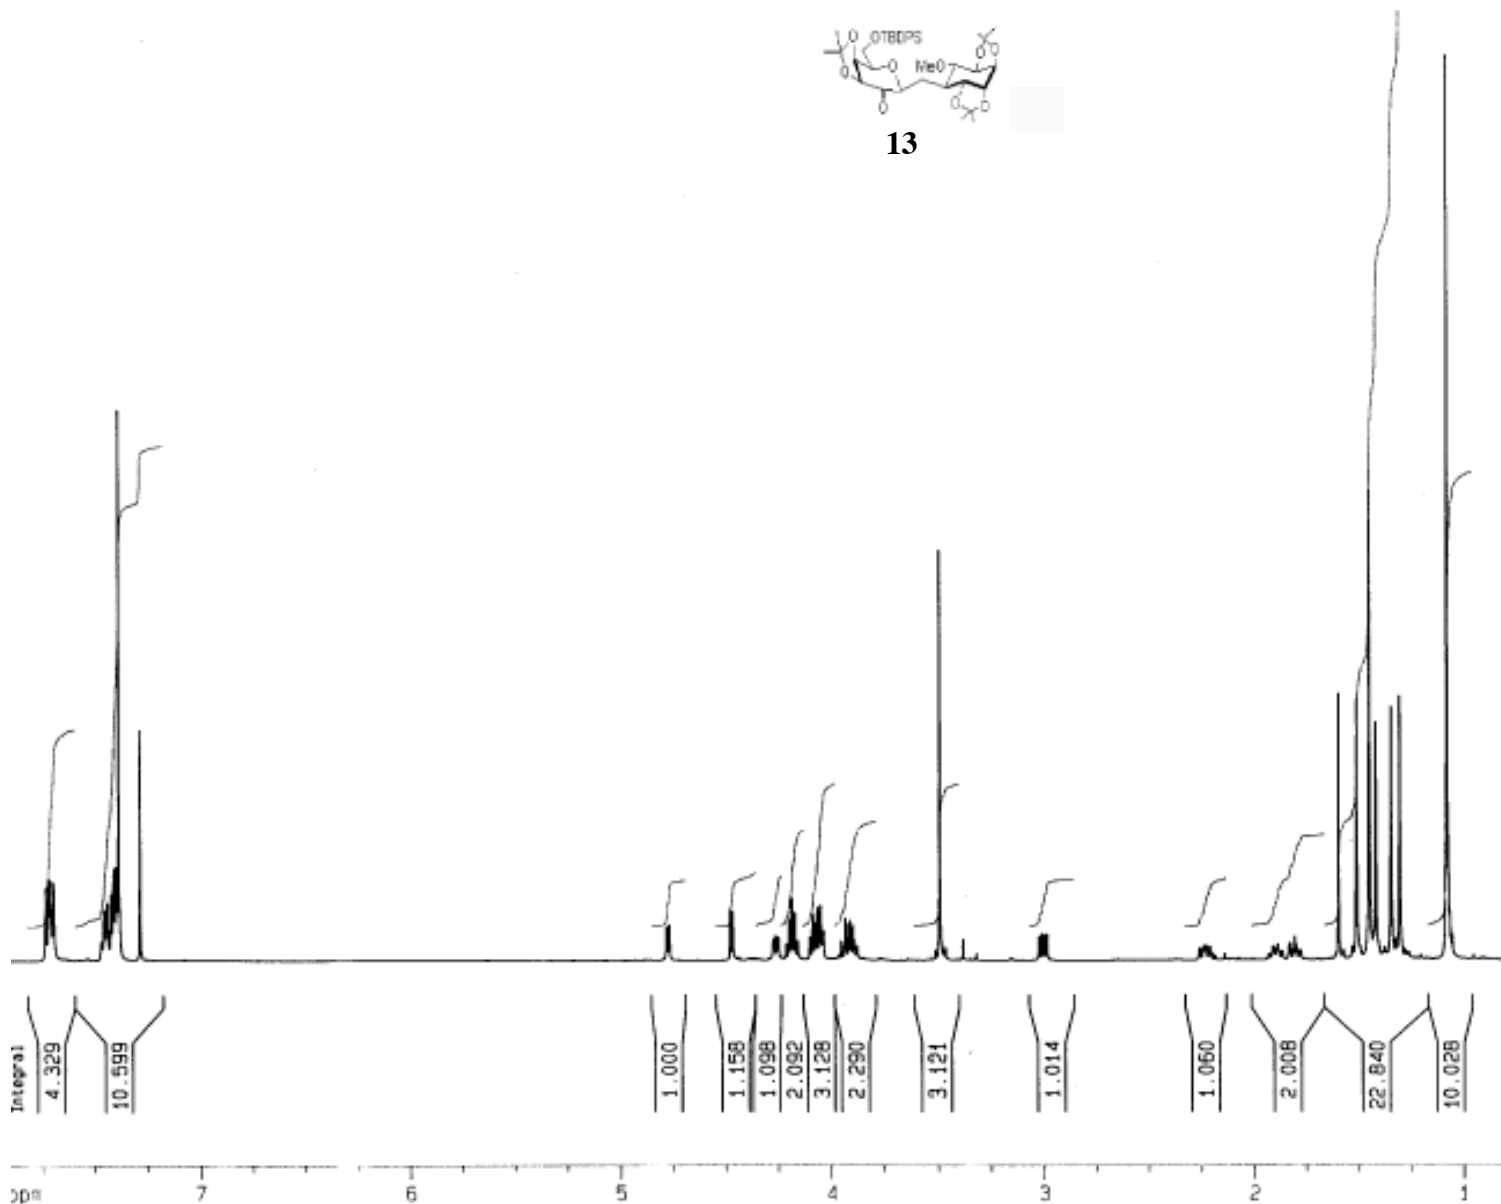

Current Data Parameters  
 NAME 05090701  
 EXPNO 22  
 PROCNO 1

F2 - Acquisition Parameters  
 Date\_ 20070509  
 Time 16.47  
 INSTRUM spect  
 PROBHD 5 mm CPOCH 13C  
 PULPROG zg30  
 TD 32768  
 SOLVENT C6D6  
 NS 8  
 DS 2  
 SWH 8012.820 Hz  
 FIDRES 0.244532 Hz  
 AQ 2.0448356 sec  
 RG 22.6  
 DM 62.400 usec  
 DE 6.00 usec  
 TE 304.0 K  
 D1 1.0000000 sec  
 MCREST 0.0000000 sec  
 MCWFK 0.0150000 sec

----- CHANNEL f1 -----  
 NUC1 1H  
 P1 9.25 usec  
 PL1 -0.50 dB  
 SFO1 500.1330885 MHz

F2 - Processing parameters  
 SI 32768  
 SF 500.1300000 MHz  
 MDM EM  
 SSB 0  
 LB 0.30 Hz  
 GB 0  
 PC 1.00

1D NMR plot parameters  
 CX 22.00 cm  
 CY 13.41 cm  
 F1P 7.923 ppm  
 F1 3962.54 Hz  
 F2P 0.771 ppm  
 F2 385.57 Hz  
 PPNMH 0.32509 ppm/cm  
 HZCM 162.58960 Hz/cm

13C NMR

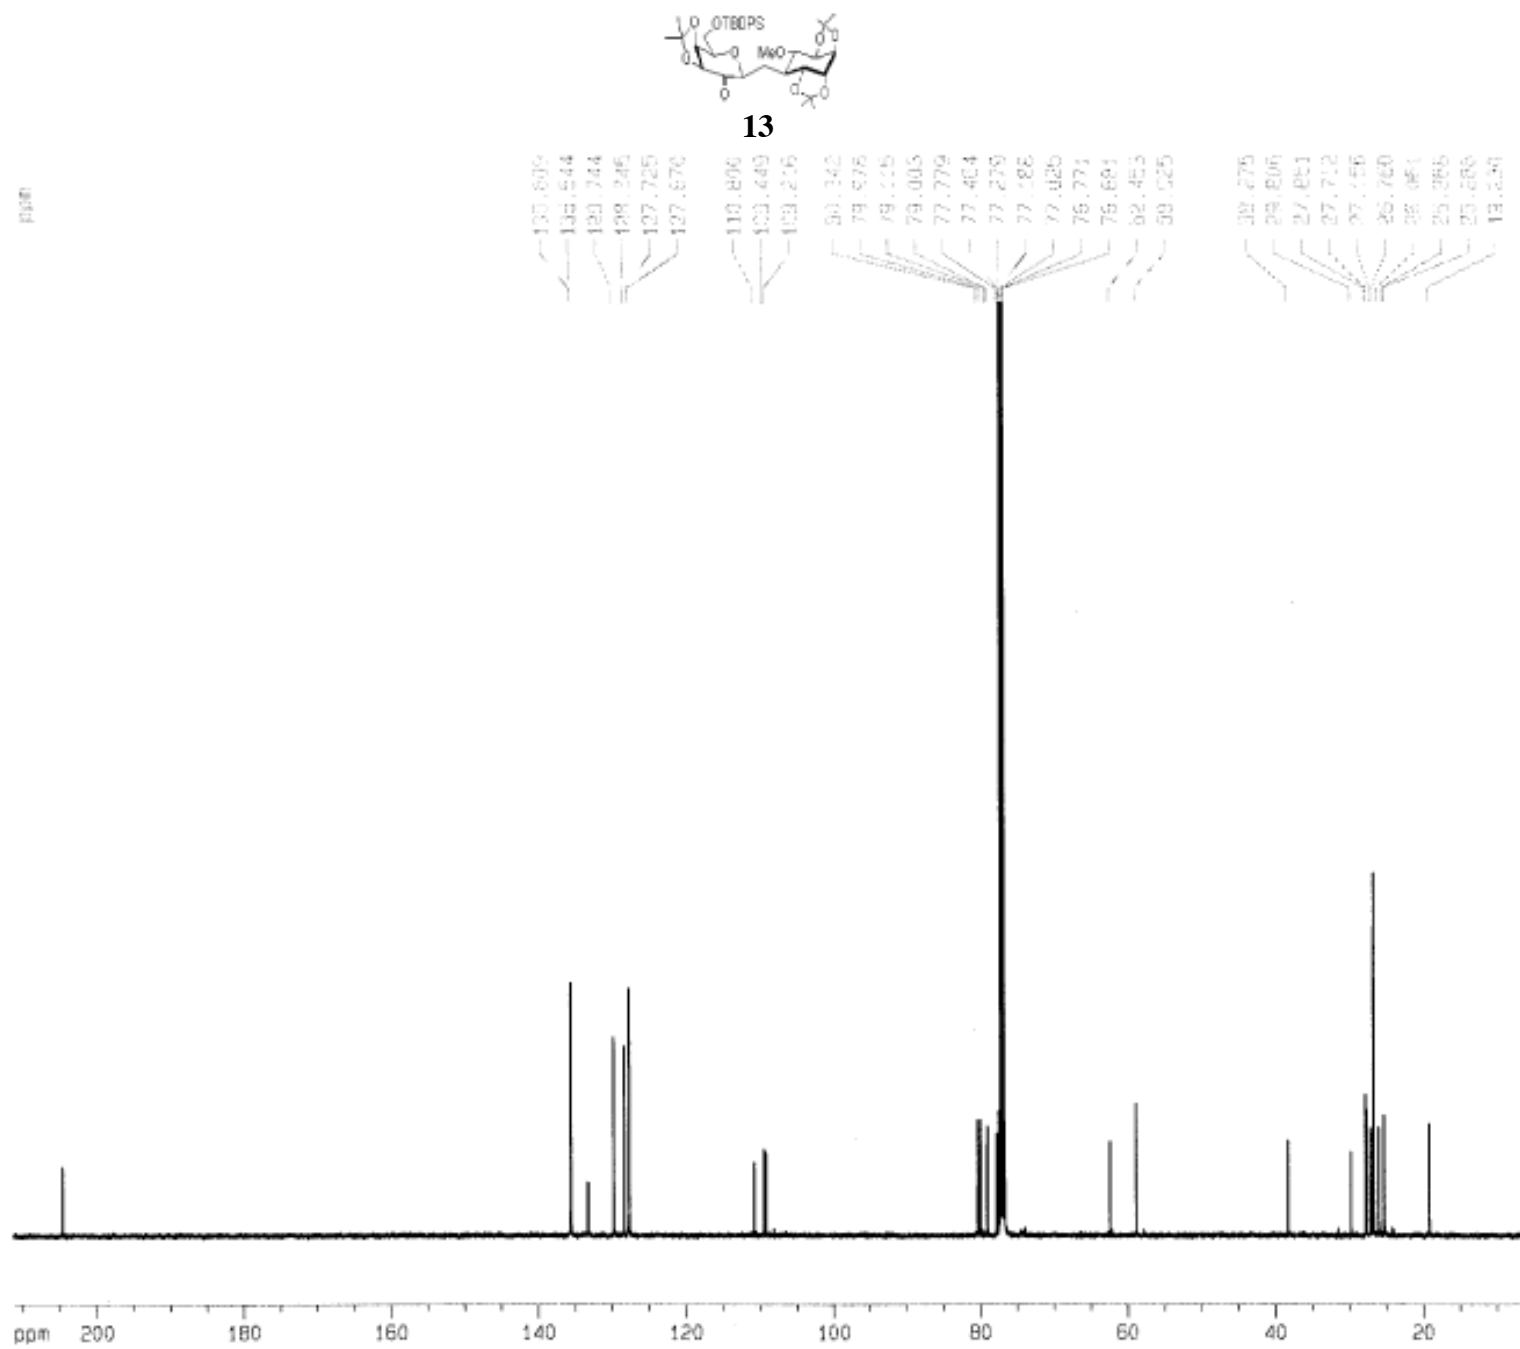

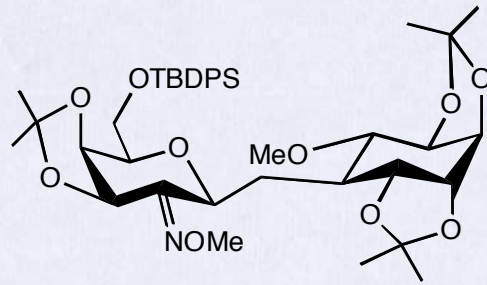

Oxime 14 (major isomer)

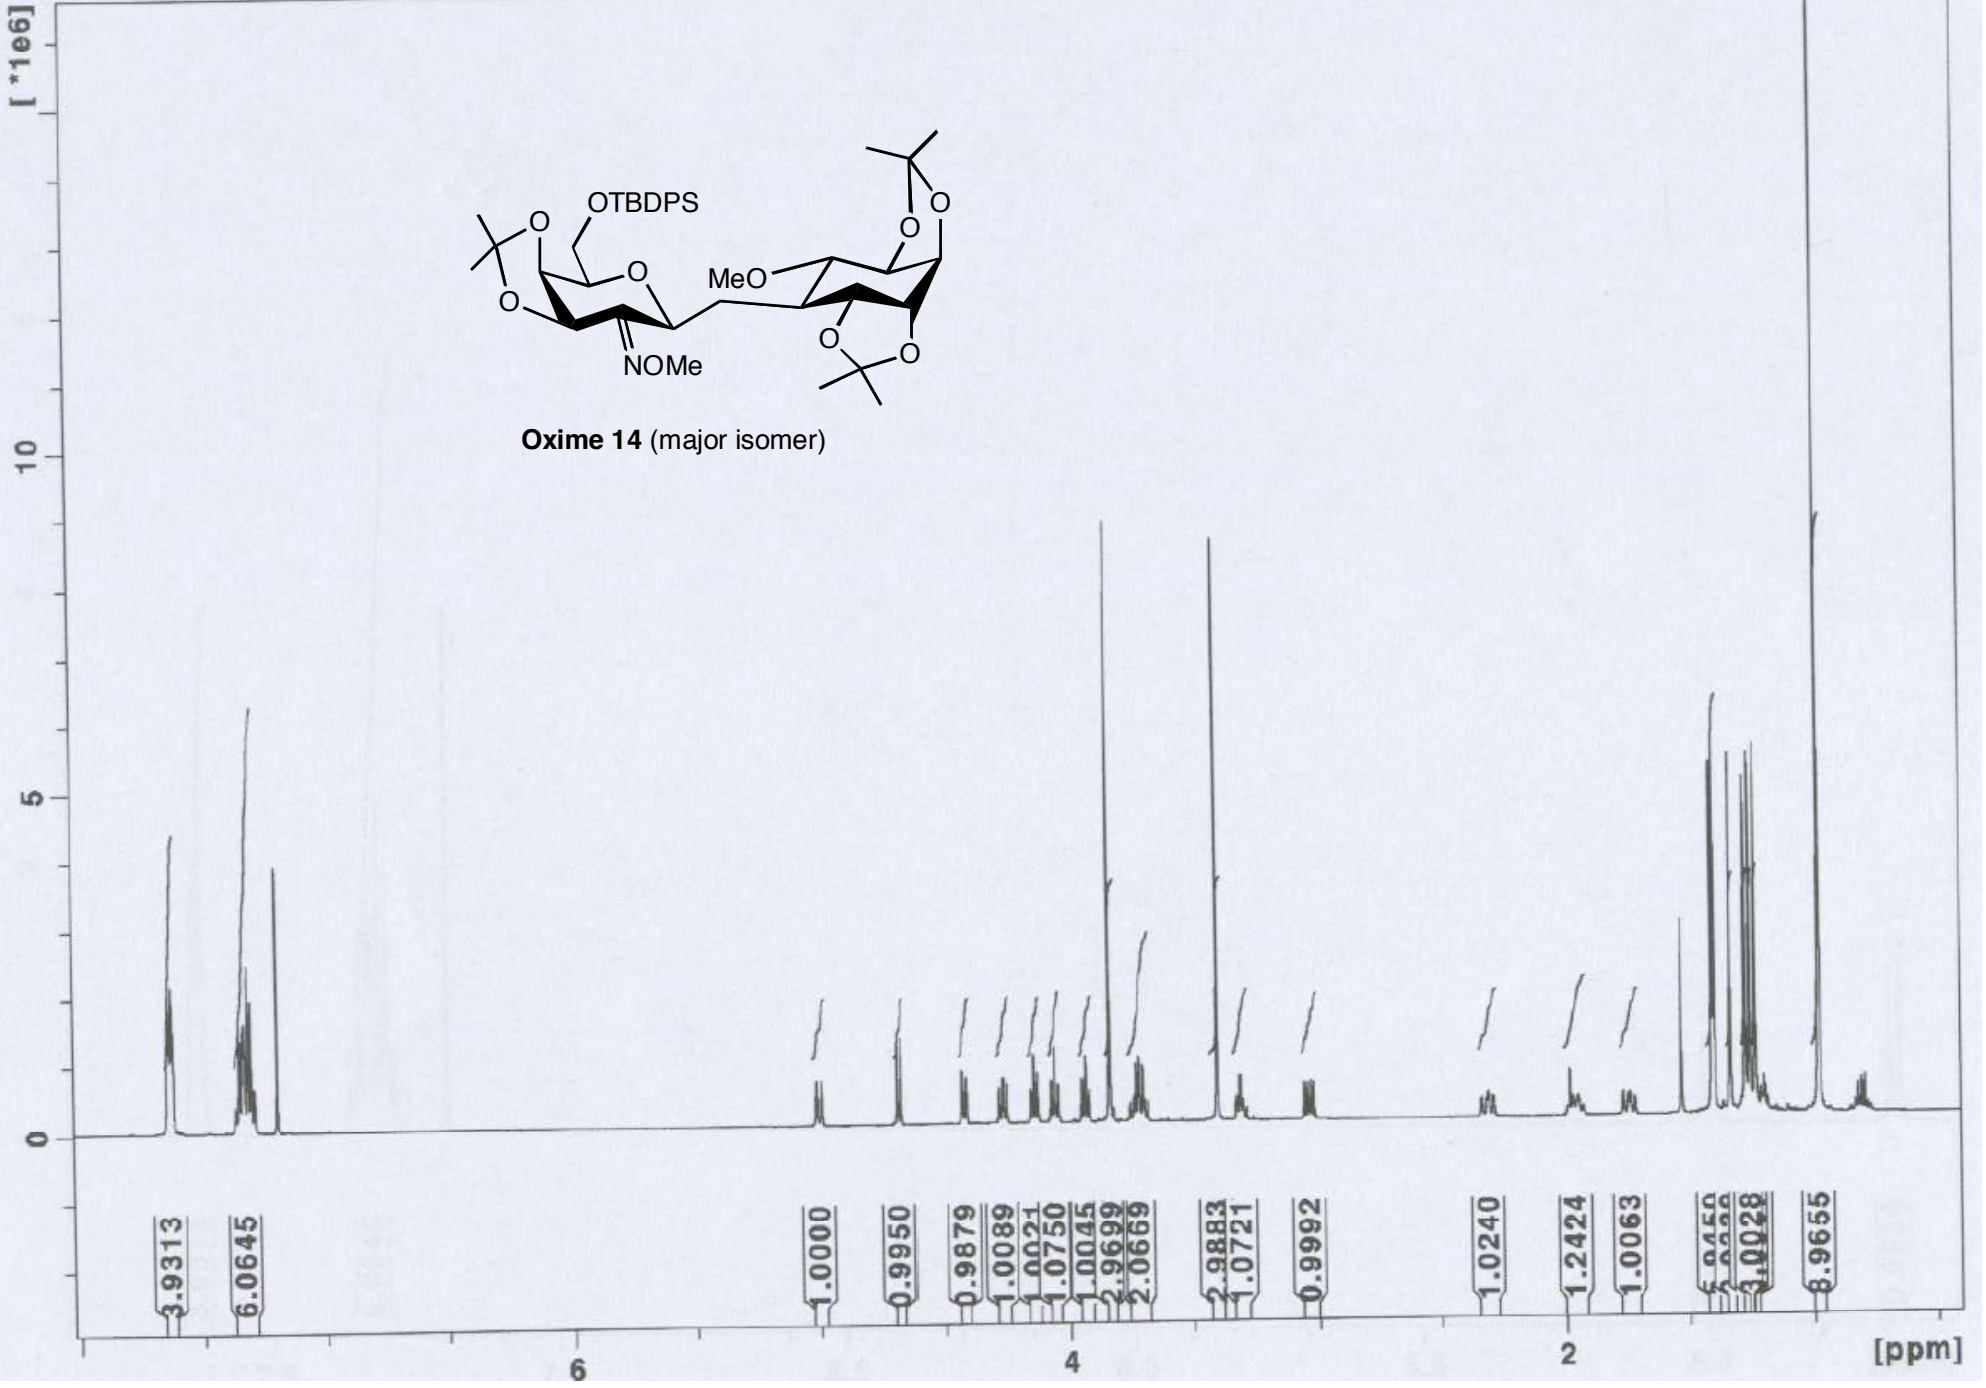

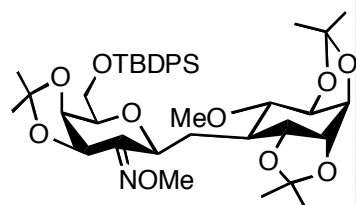

Oxime 14 (major isomer)

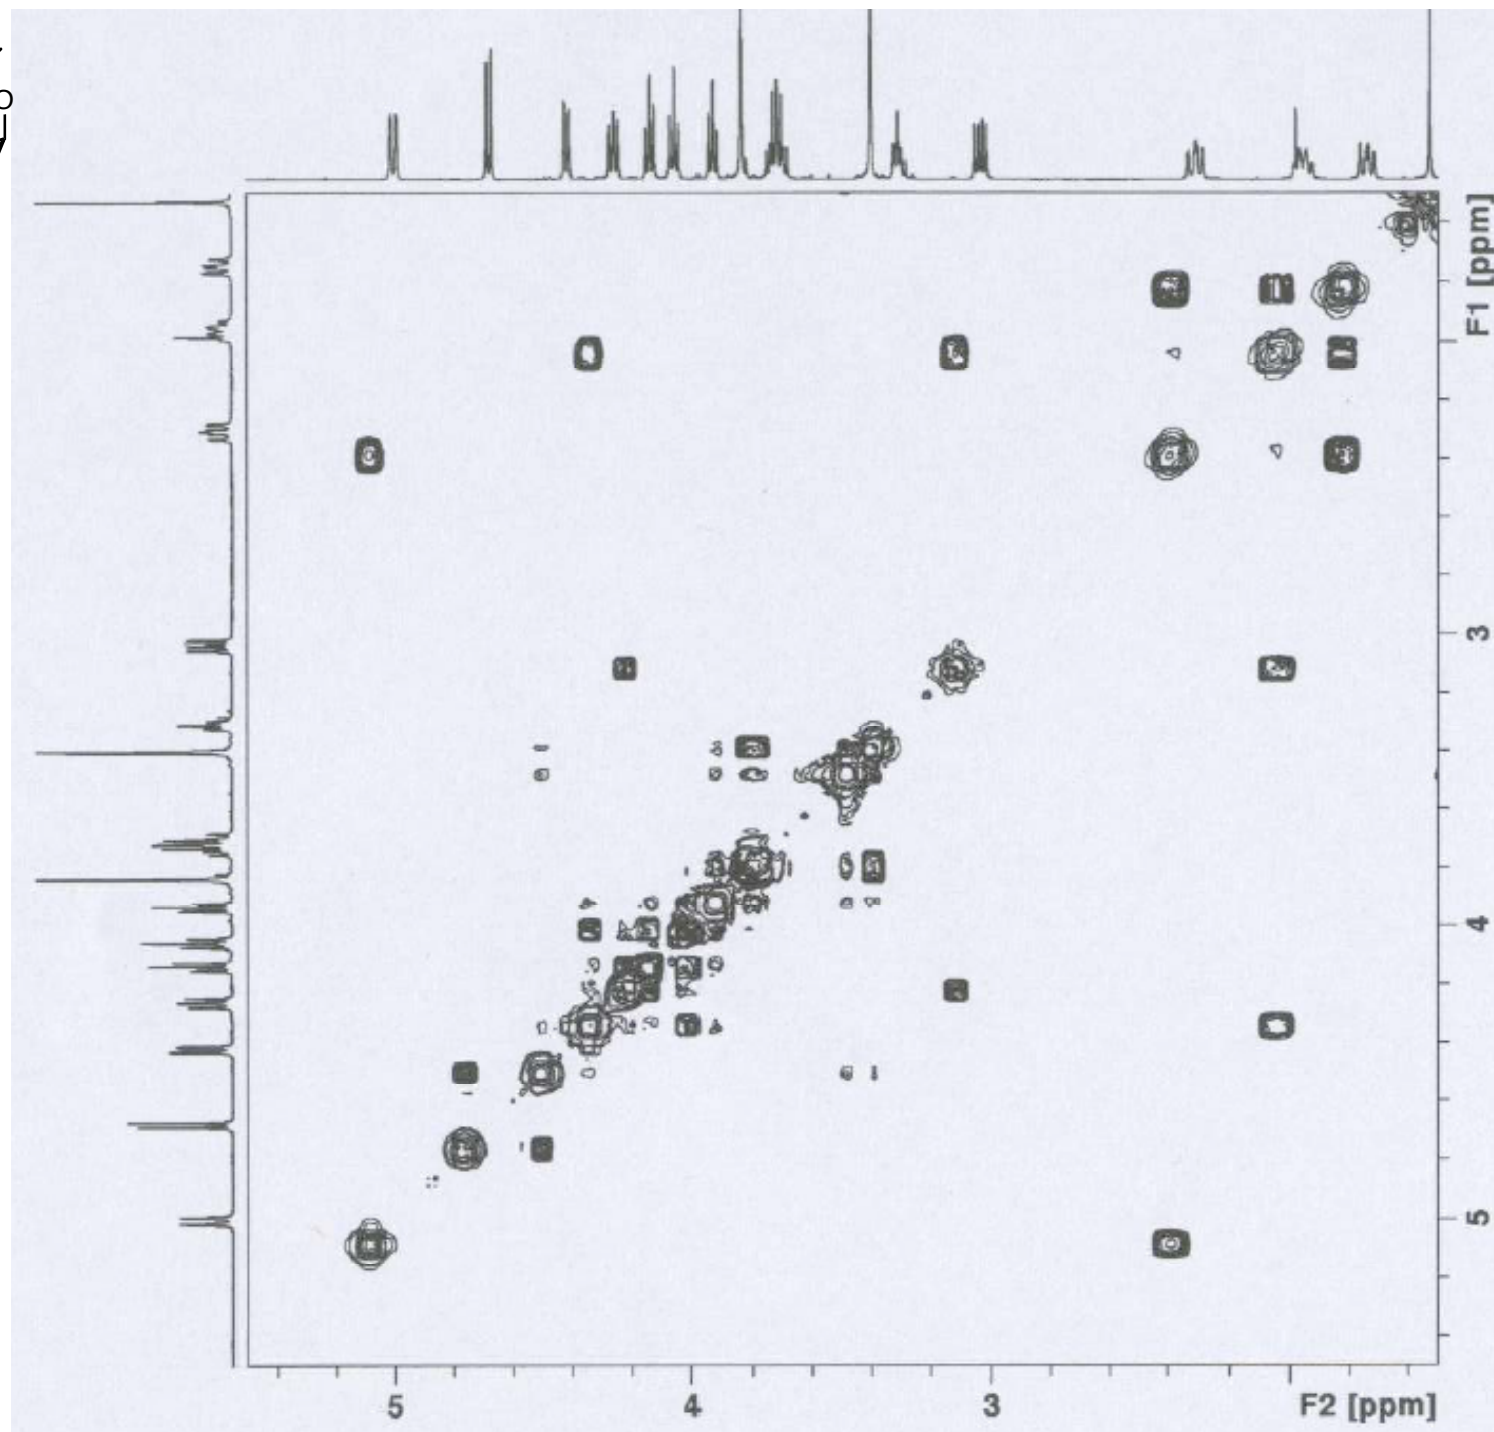

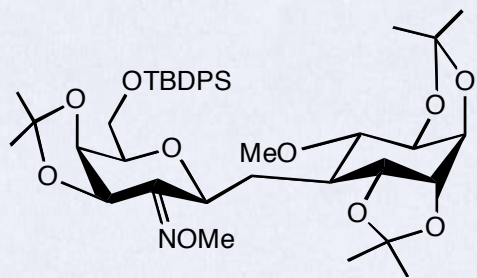

**Oxime 14** (major isomer)

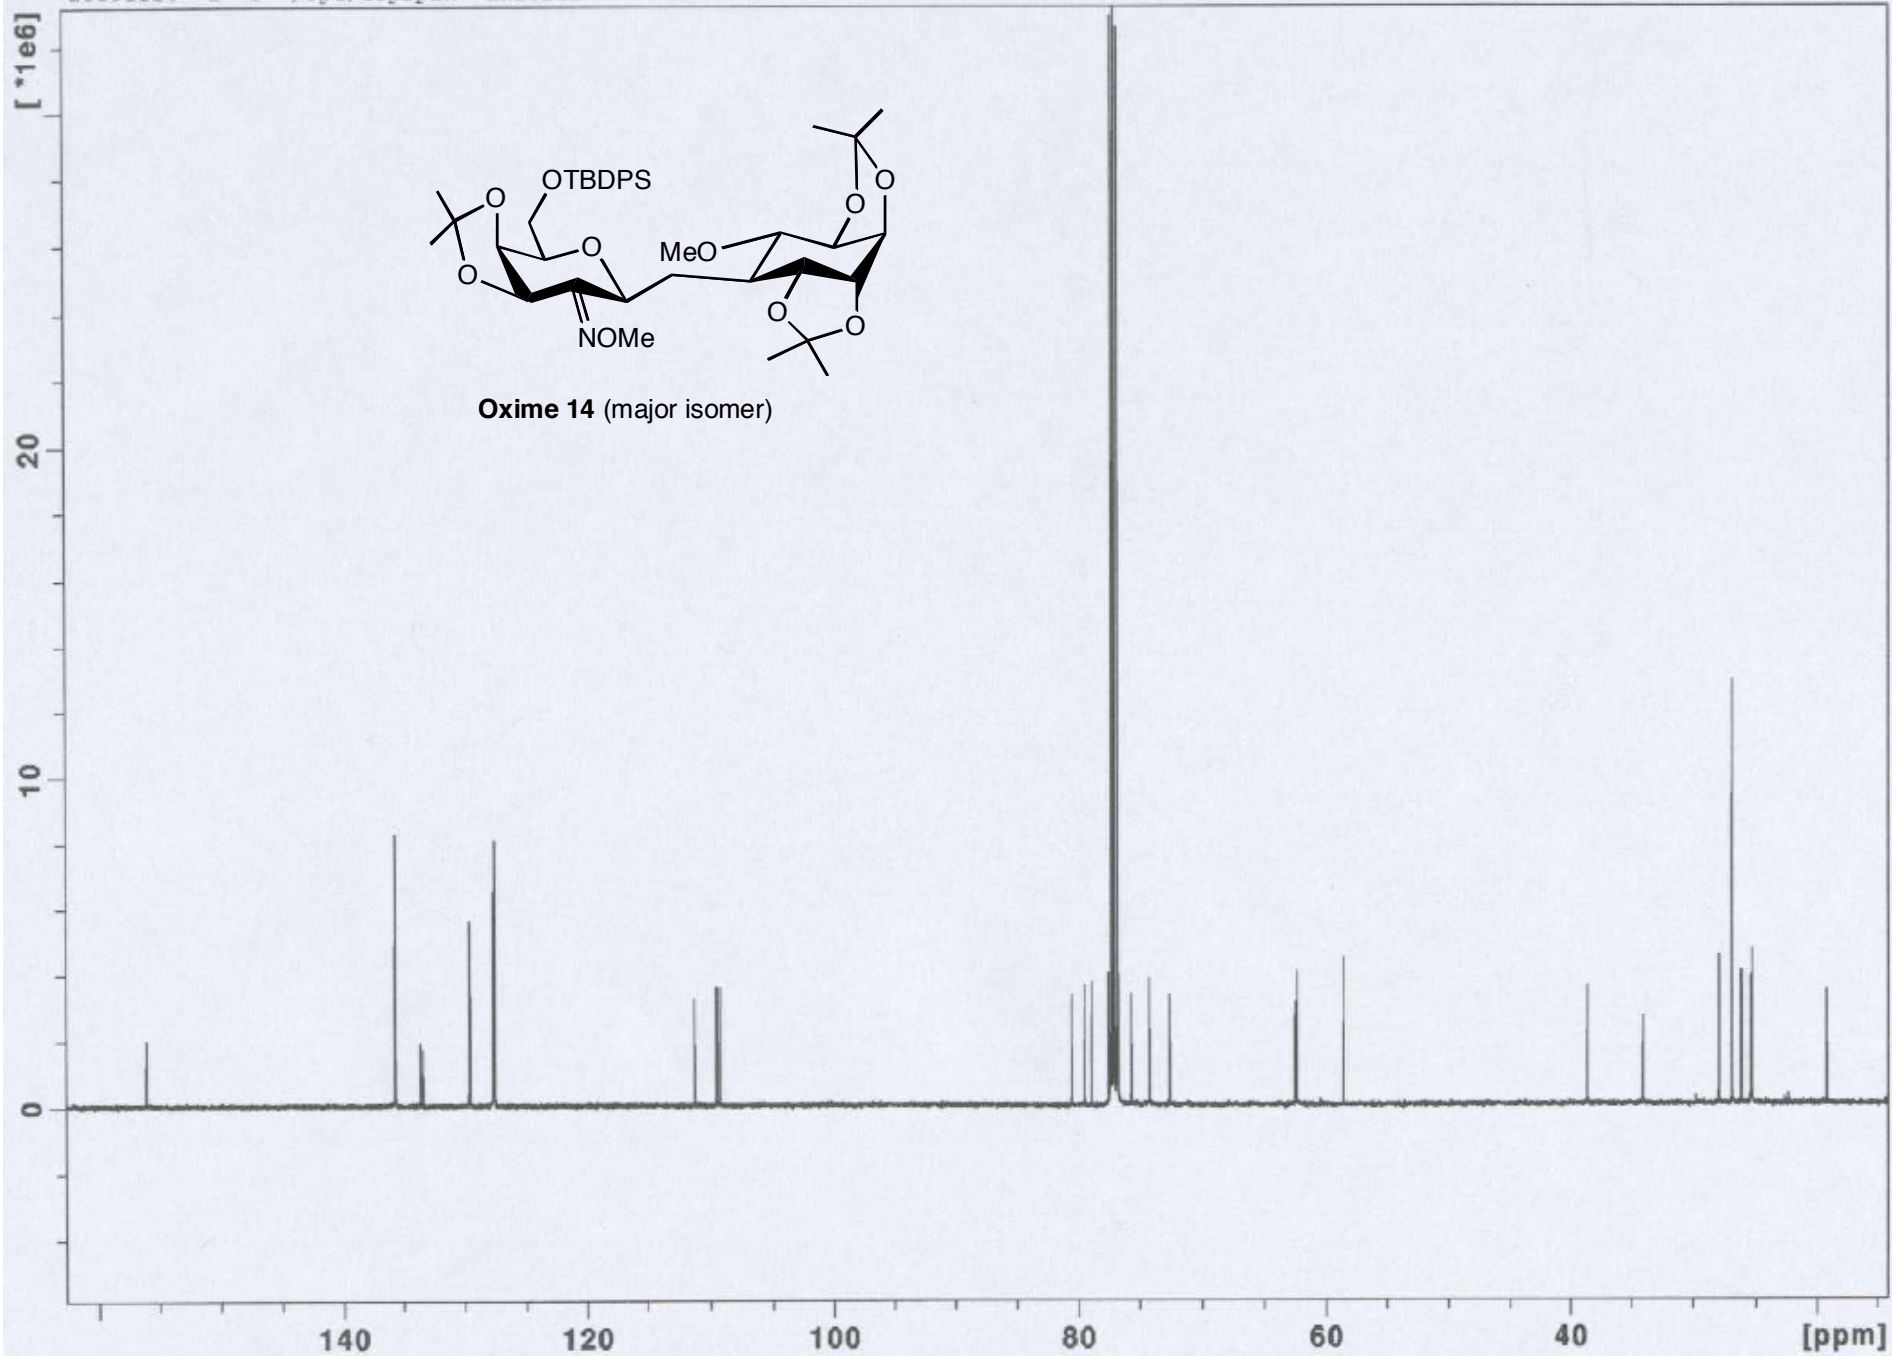



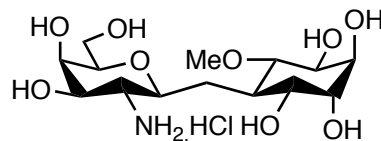

**C-INS-2.HCl**

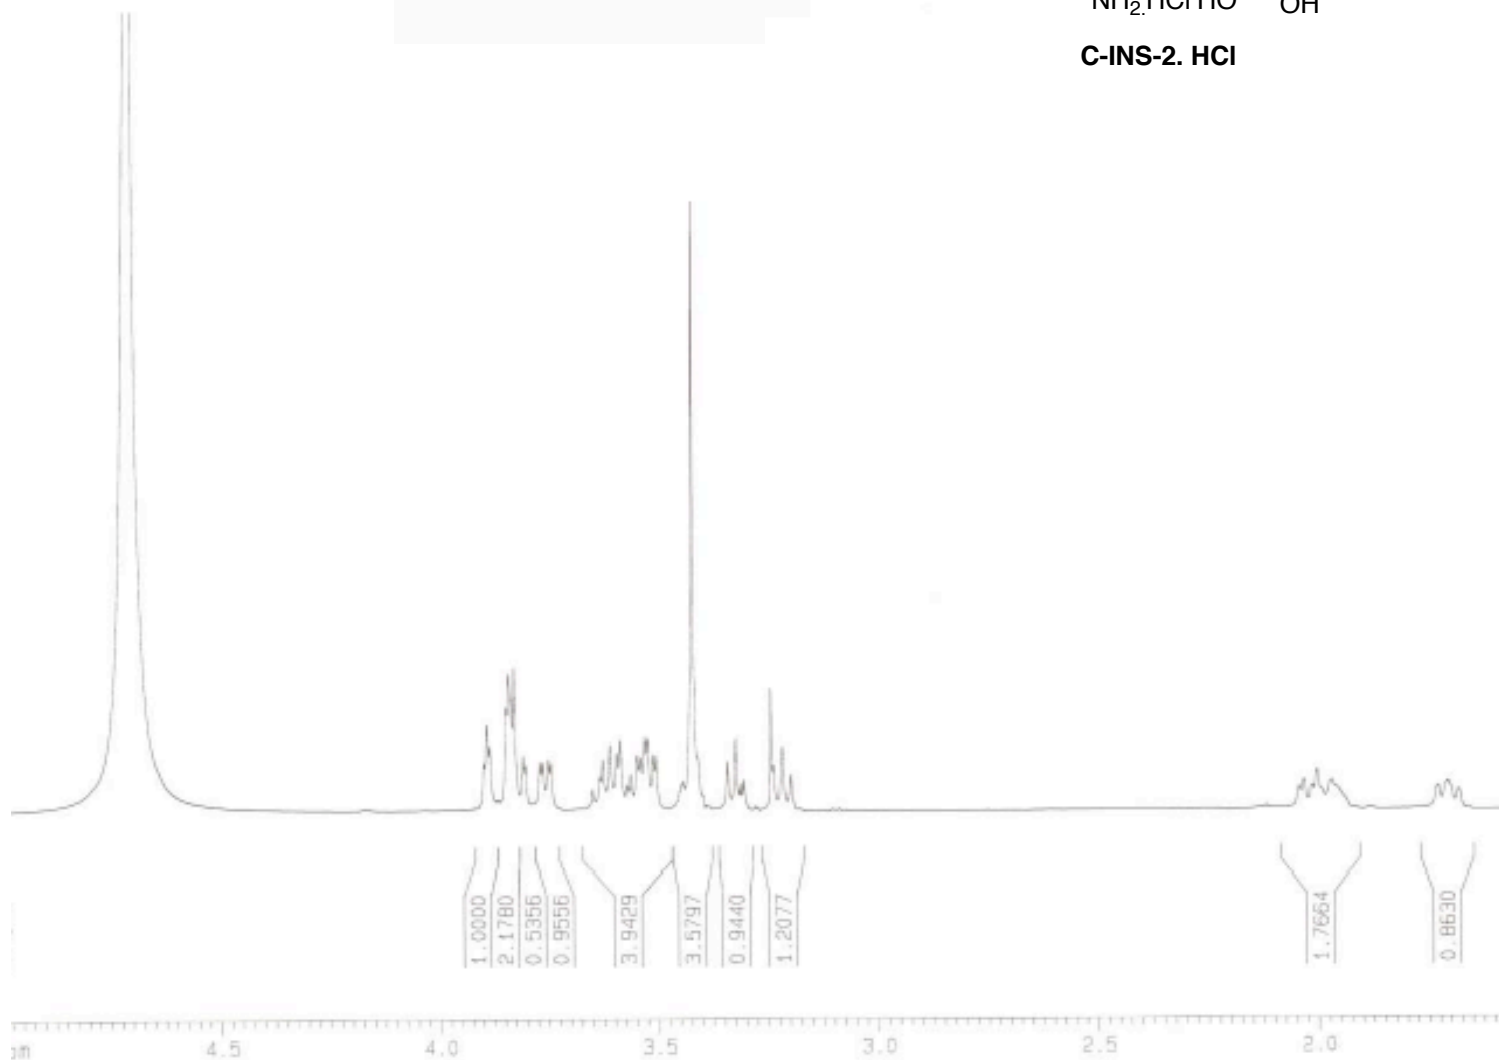

Current Data Parameters  
 NAME 20080328  
 EXPNO 1  
 PROCNO 1

F2 - Acquisition Parameters  
 Date\_ 20080328  
 Time 11.24  
 INSTRUM spect  
 PROBHD 5 mm CPDCH 13C  
 PULPROG zg30  
 TD 32768  
 SOLVENT C6D6  
 NS 8  
 DS 2  
 SWH 8012.820 Hz  
 FIDRES 0.244532 Hz  
 AQ 2.0448356 sec  
 RG 35.9  
 DM 62.400 usec  
 DE 6.00 usec  
 TE 303.0 K  
 D1 1.00000000 sec  
 MCREST 0.00000000 sec  
 MCWRR 0.01500000 sec

----- CHANNEL f1 -----  
 NUC1 1H  
 P1 9.25 usec  
 PL1 -0.50 dB  
 SFO1 500.1330895 MHz

F2 - Processing parameters  
 SI 32768  
 SF 500.1300000 MHz  
 WDM EM  
 SSB 0  
 LB 0.30 Hz  
 GB 0  
 PC 1.00

1D NMR plot parameters  
 EX 22.00 cm  
 CY 16.38 cm  
 F1P 5.020 ppm  
 F1 2510.70 Hz  
 F2P 1.563 ppm  
 F2 701.09 Hz  
 PPMCK 0.15712 ppm/cm  
 HZCM 78.58234 Hz/cm

ppm

79.8734  
78.1860  
77.6135  
73.8901  
71.9836  
71.7719  
71.3462  
71.2058  
69.8554  
69.1074

61.3572

58.5337

37.8066

26.4283

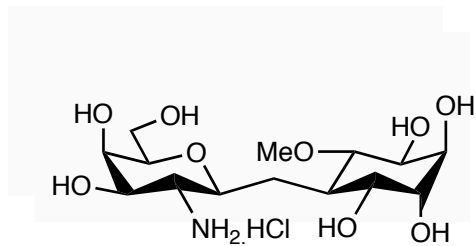

**C-INS-2.HCl**

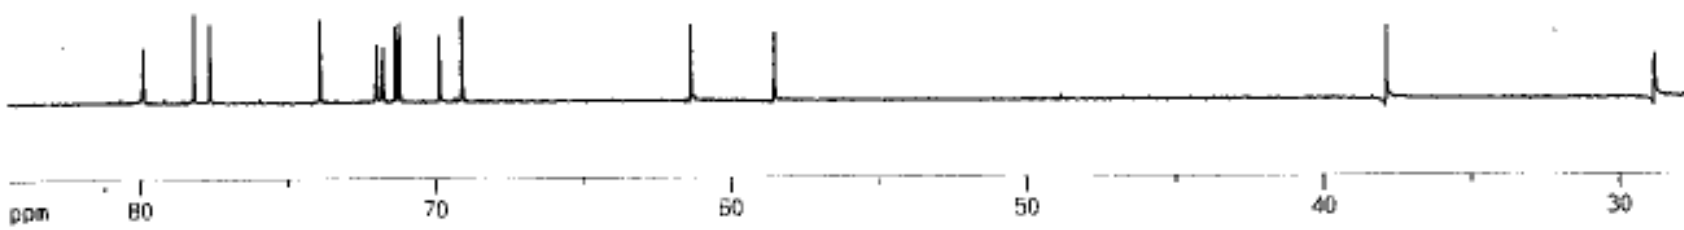

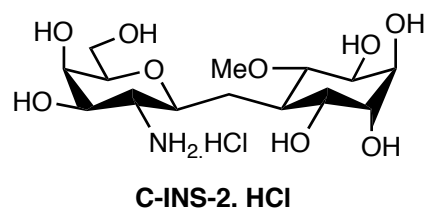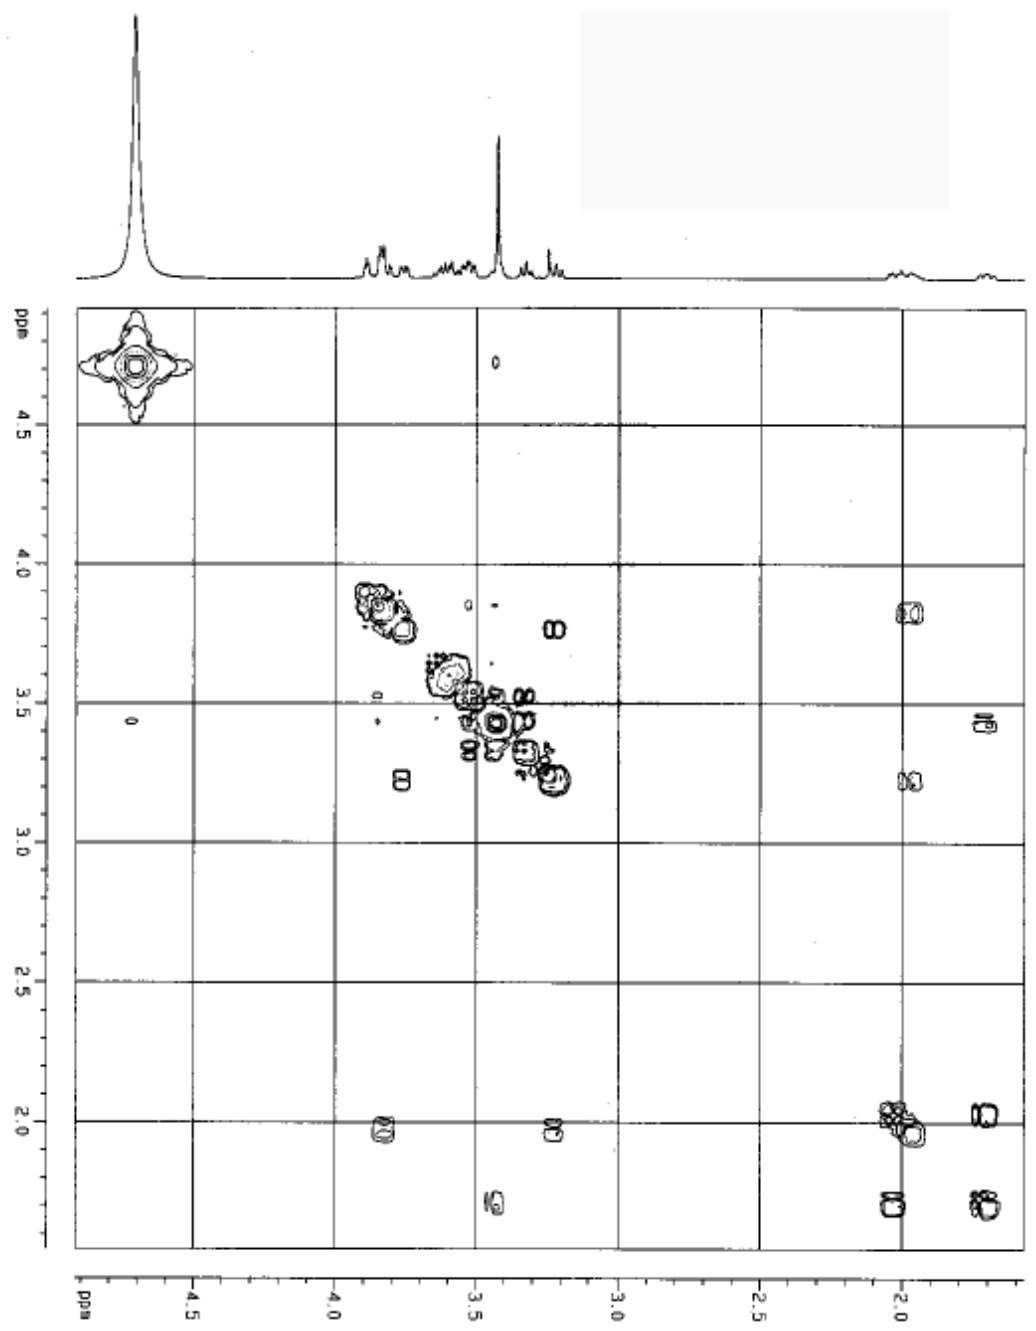



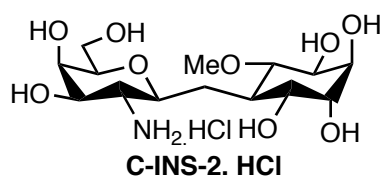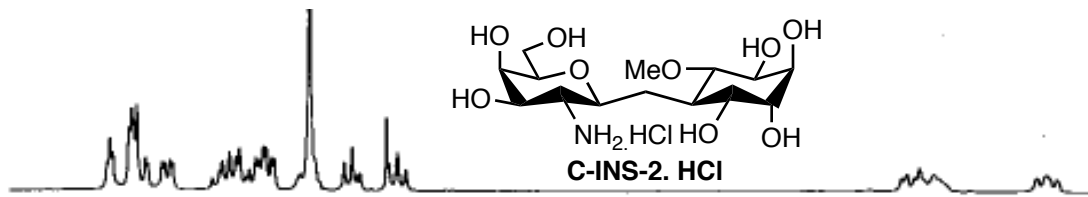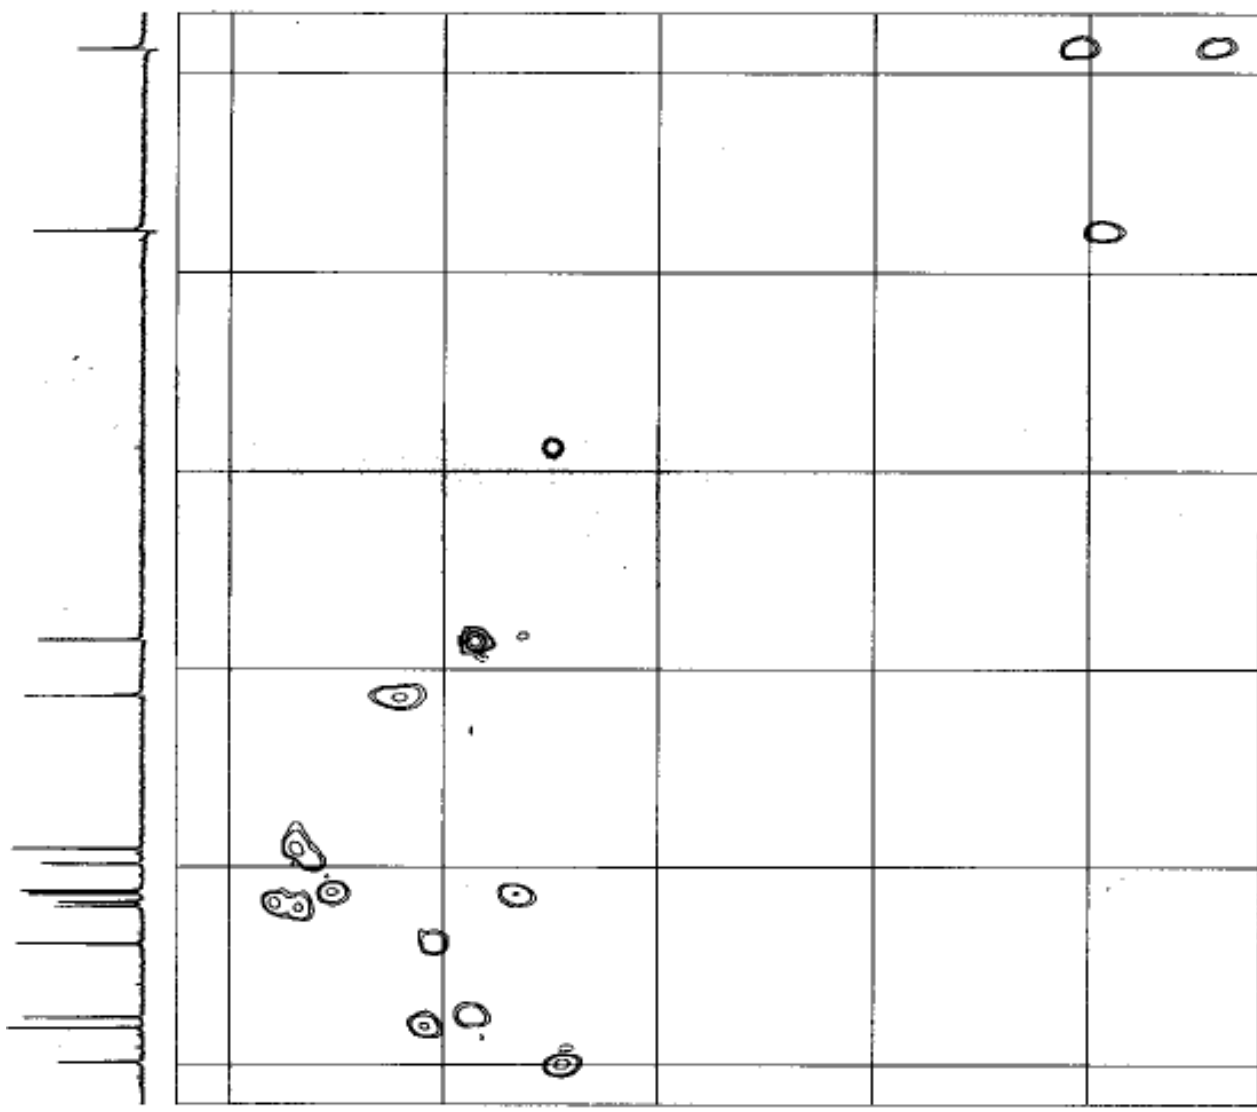

ppm 3.5 3.0 2.5 2.0

Current Data Parameters  
 NAME 2000000  
 EXPNO 7  
 PROCNO 1

F2 - Acquisition Parameters  
 Date\_ 20080202  
 Time 11.30  
 INSTRUM spect  
 PROBRW 5 MHz CPDCH 1.0  
 PULPROG zgpg30  
 TO 1024  
 SOLVENT DMSO  
 NS 2  
 DS 16  
 SWH 1070.857 Hz  
 FIDRES 0.53047 Hz  
 AQ 0.678028 sec  
 RG 1024.4  
 SN 75.858 dB  
 SC 0.00 mm  
 SS 0.00 s  
 DQ02 1.0000000  
 AQ 0.0000000 Hz  
 EQ 1.0000000 Hz  
 RQ 0.0010414 Hz  
 SFO 500.13644 MHz  
 FID 0.0000000 Hz  
 F10 0.0001000 Hz  
 F14 0.0012490 Hz  
 SFL 0.0007184 Hz  
 SFO 500.13644 MHz  
 ACSF 0.0000000 Hz  
 ACBS 0.2400001 Hz  
 STICK 0

----- Channel f1 -----  
 NUC1 31  
 P1 0.25000000  
 PC 10.000000  
 PL1 0.000000  
 SFO1 500.13644 MHz

----- Channel f2 -----  
 CPDPRG2 zgpg30  
 NUC2 13C  
 P2 0.25000000  
 PC 10.000000  
 PL2 0.000000  
 PL12 0.000000  
 SFO2 101.626180 MHz

----- CHANNEL CHANNEL -----  
 CPDPRG1 zgpg30  
 CPDPRG2 zgpg30  
 GPC1 0.00 Hz  
 GPC2 0.00 Hz  
 GPC3 0.00 Hz  
 GPC4 0.00 Hz  
 GPC5 0.00 Hz  
 GPC6 0.00 Hz  
 GPC7 0.00 Hz  
 GPC8 0.00 Hz  
 GPC9 0.00 Hz  
 GPC10 0.00 Hz  
 GPC11 0.00 Hz  
 GPC12 0.00 Hz  
 GPC13 0.00 Hz  
 GPC14 0.00 Hz  
 GPC15 0.00 Hz  
 GPC16 0.00 Hz  
 GPC17 0.00 Hz  
 GPC18 0.00 Hz  
 GPC19 0.00 Hz  
 GPC20 0.00 Hz  
 GPC21 0.00 Hz  
 GPC22 0.00 Hz  
 GPC23 0.00 Hz  
 GPC24 0.00 Hz  
 GPC25 0.00 Hz  
 GPC26 0.00 Hz  
 GPC27 0.00 Hz  
 GPC28 0.00 Hz  
 GPC29 0.00 Hz  
 GPC30 0.00 Hz  
 GPC31 0.00 Hz  
 GPC32 0.00 Hz  
 GPC33 0.00 Hz  
 GPC34 0.00 Hz  
 GPC35 0.00 Hz  
 GPC36 0.00 Hz  
 GPC37 0.00 Hz  
 GPC38 0.00 Hz  
 GPC39 0.00 Hz  
 GPC40 0.00 Hz  
 GPC41 0.00 Hz  
 GPC42 0.00 Hz  
 GPC43 0.00 Hz  
 GPC44 0.00 Hz  
 GPC45 0.00 Hz  
 GPC46 0.00 Hz  
 GPC47 0.00 Hz  
 GPC48 0.00 Hz  
 GPC49 0.00 Hz  
 GPC50 0.00 Hz

F1 - Acquisition parameters  
 NS 2  
 DS 16  
 SWH 1070.857 Hz  
 FIDRES 0.53047 Hz  
 AQ 0.678028 sec  
 RG 1024.4  
 SN 75.858 dB  
 SC 0.00 mm  
 SS 0.00 s  
 DQ02 1.0000000

F2 - Processing parameters  
 SI 1024  
 SF 500.13644 MHz  
 DS 16  
 SWH 1070.857 Hz  
 LB 0.00 Hz  
 GB 0  
 PC 1.00

F1 - Processing parameters  
 SI 1024  
 SF 500.13644 MHz  
 DS 16  
 SWH 1070.857 Hz  
 LB 0.00 Hz  
 GB 0  
 PC 1.00

2D NMR list parameters  
 CQ 10.00 Hz  
 CQ1 10.00 Hz  
 FWH0 4.100 MHz  
 FWH1 2062.00 Hz  
 FWH2 5.100 MHz  
 FWH3 700.00 Hz  
 FWH4 50.000 MHz  
 FWH5 10000.00 Hz  
 FWH6 27.000 MHz  
 FWH7 1000.00 Hz  
 FWH8 0.1000 MHz/cm  
 FWH9 70.0000 MHz/cm  
 FWH10 0.1000 MHz/cm  
 FWH11 400.0000 MHz/cm

30  
40  
50  
60  
70  
ppm

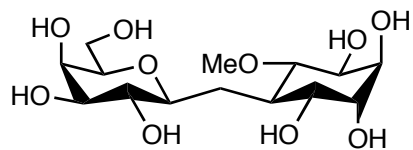

**C-INS-2-OH 3**

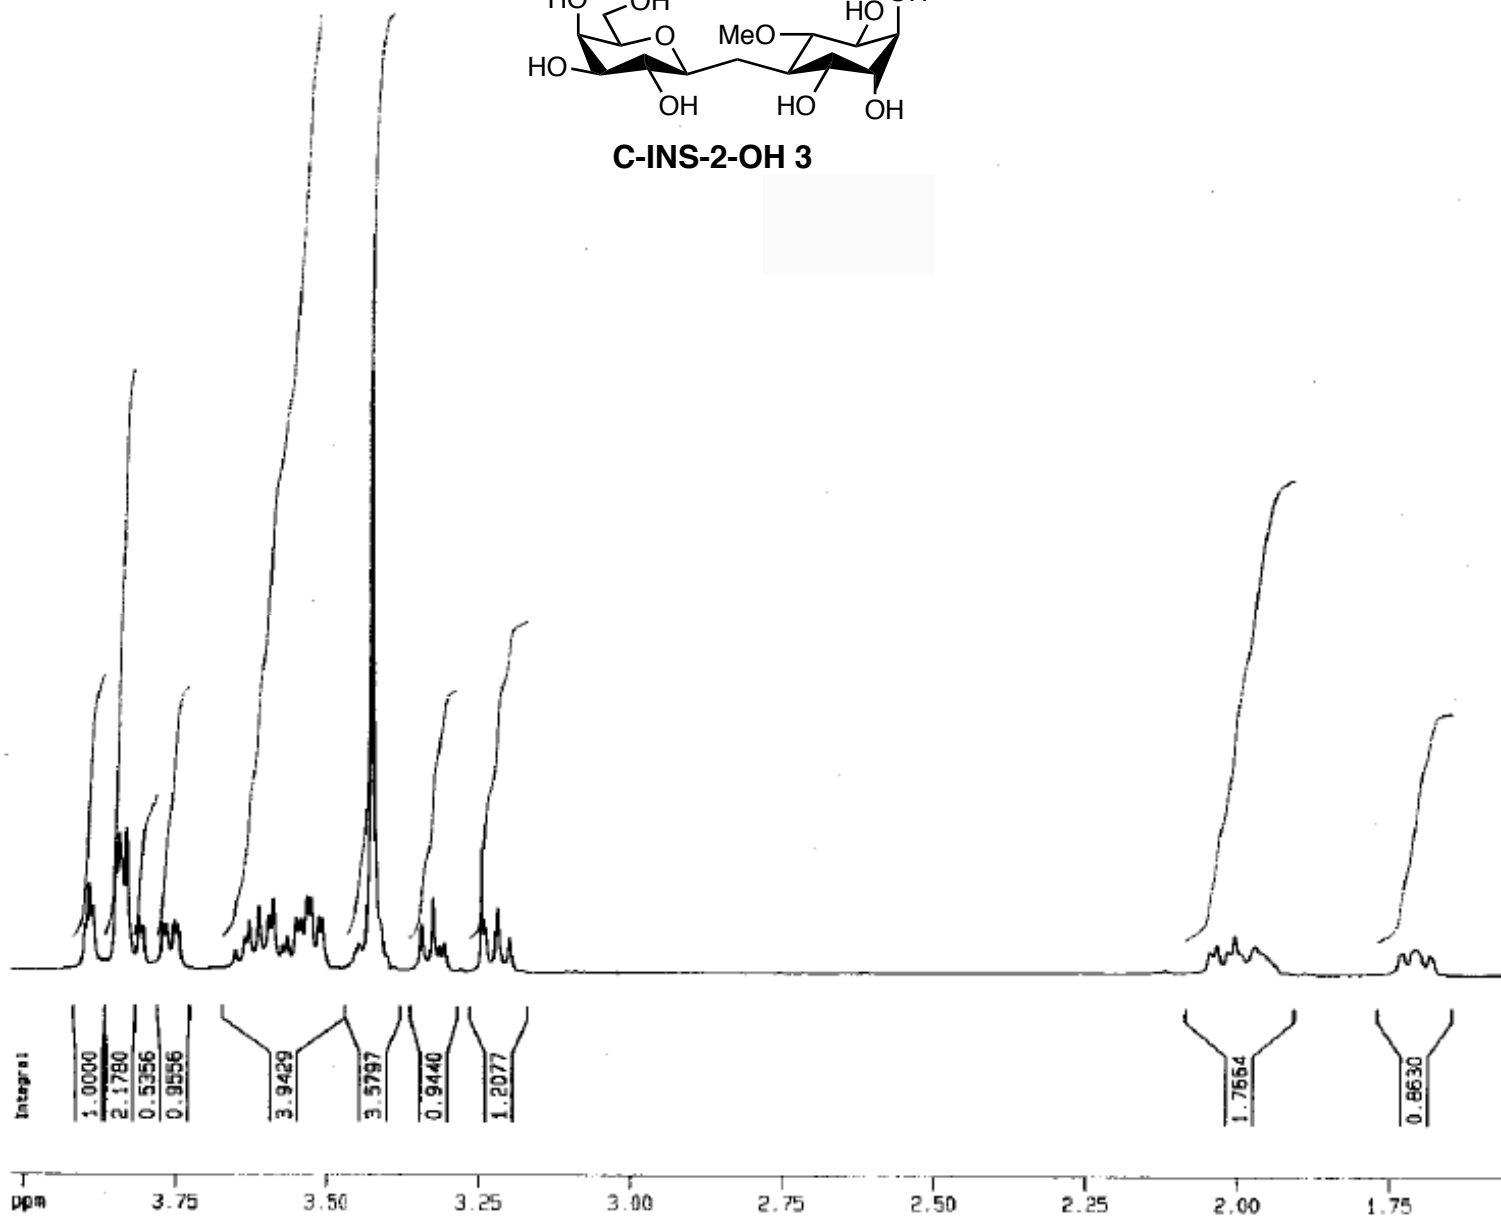

Current Data Parameters  
 NAME 20080328  
 EXPNO 1  
 PROCNO 1

F2 - Acquisition Parameters  
 Date\_ 20080328  
 Time 10.24  
 INSTRUM spect  
 PROBHD 5 mm CPOCH 13C  
 PULPROG zg30  
 TD 32768  
 SOLVENT C606  
 NS 8  
 OS 2  
 SWH 8012.820 Hz  
 FIDRES 0.24632 Hz  
 AQ 2.0448356 sec  
 RG 35.9  
 DM 62.400 usec  
 DE 6.00 usec  
 TE 303.0 K  
 D1 1.0000000 sec  
 MCREST 0.0000000 sec  
 MCHRG 0.0150000 sec

----- CHANNEL f1 -----  
 NUC1 1H  
 P1 9.25 usec  
 PL1 -0.50 dB  
 SFO1 500.130085 MHz

F2 - Processing parameters  
 SI 32768  
 SF 500.130085 MHz  
 MM EM  
 SSB 0  
 LB 0.30 Hz  
 GB 0  
 PC 1.00

1D NMR plot parameters  
 CX 22.00 cm  
 CV 15.38 cm  
 F1P 4.020 ppm  
 F1 2010.70 Hz  
 F2P 1.559 ppm  
 F2 779.54 Hz  
 PPMCH 0.11189 ppm/cm  
 HZCM 55.96159 Hz/cm

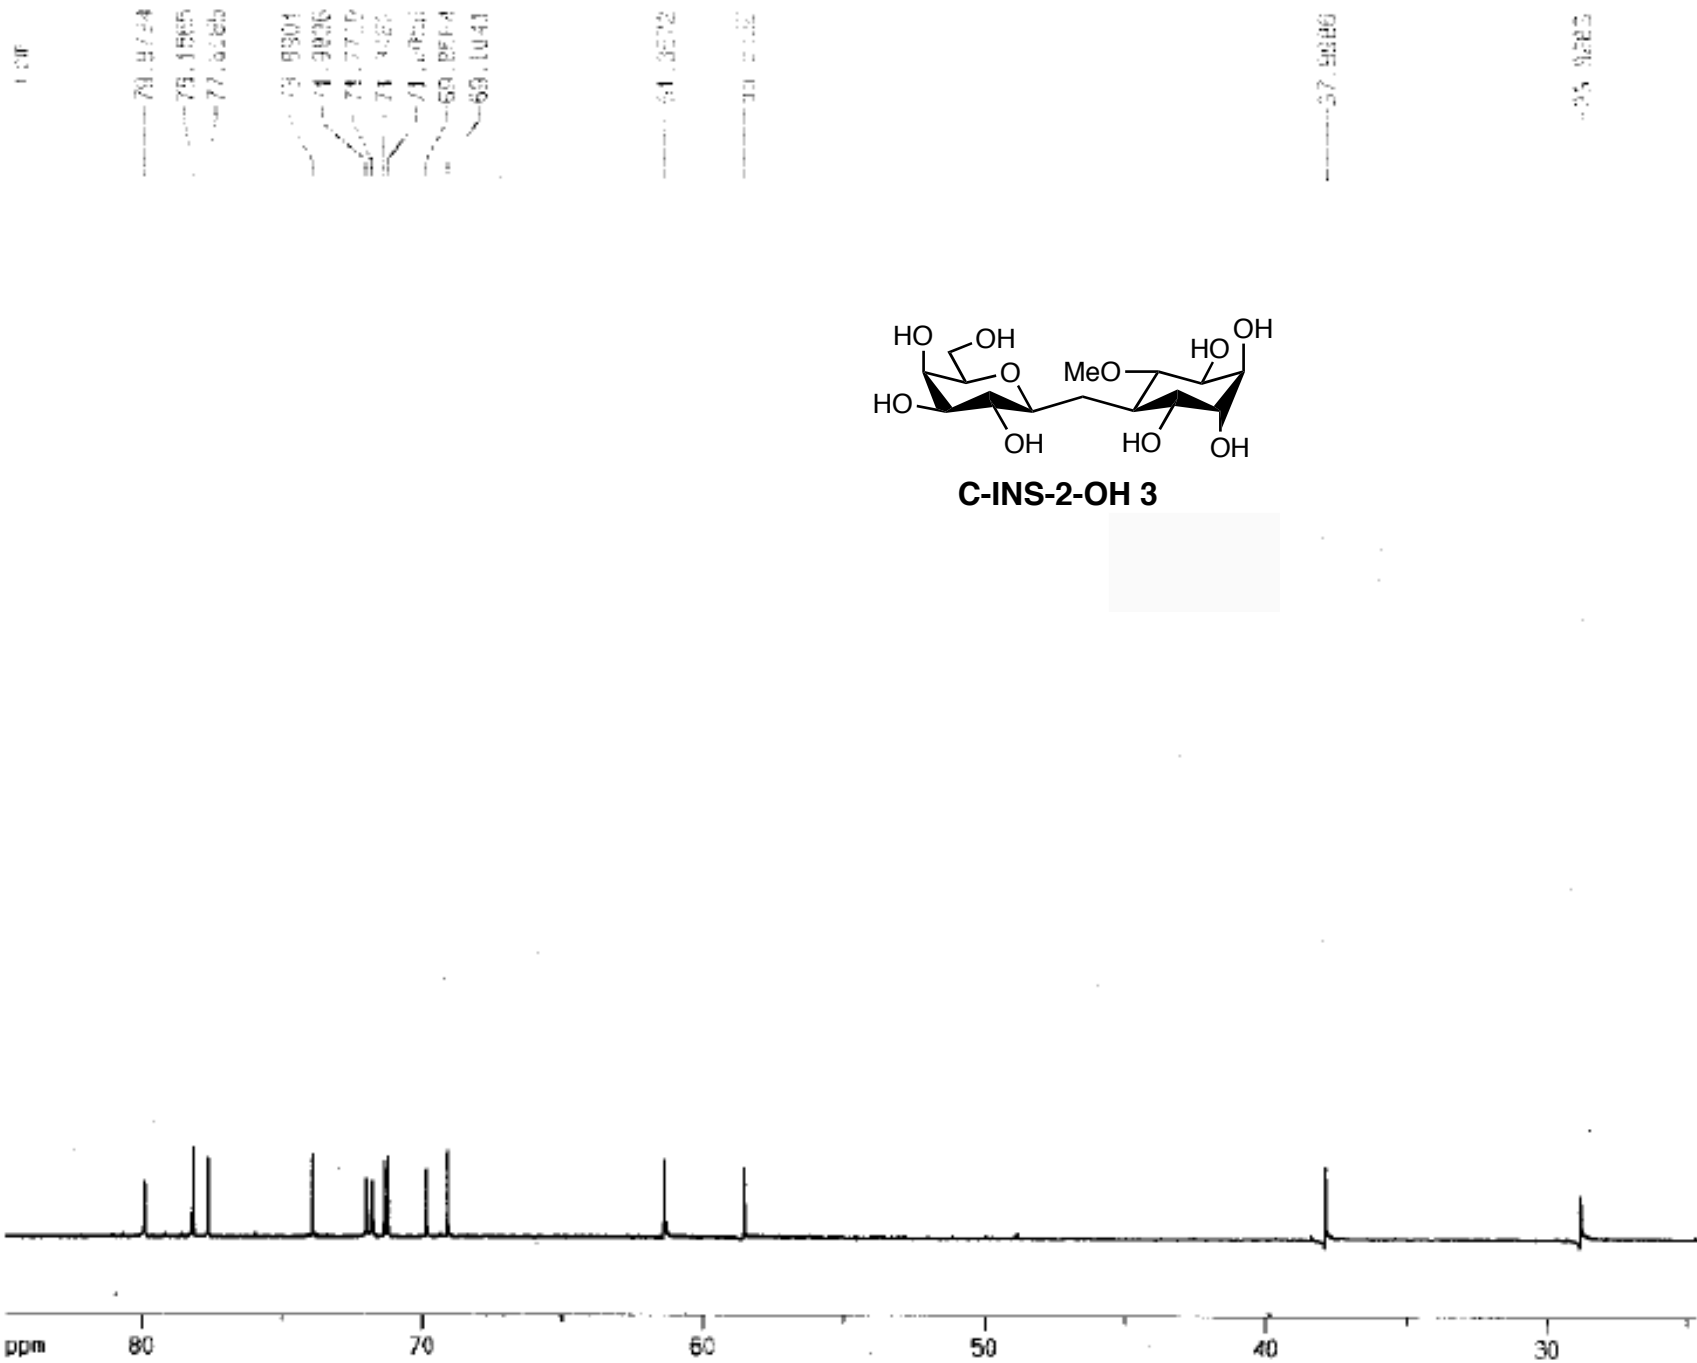

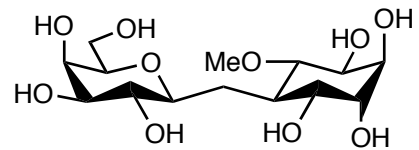

**C-INS-2-OH 3**

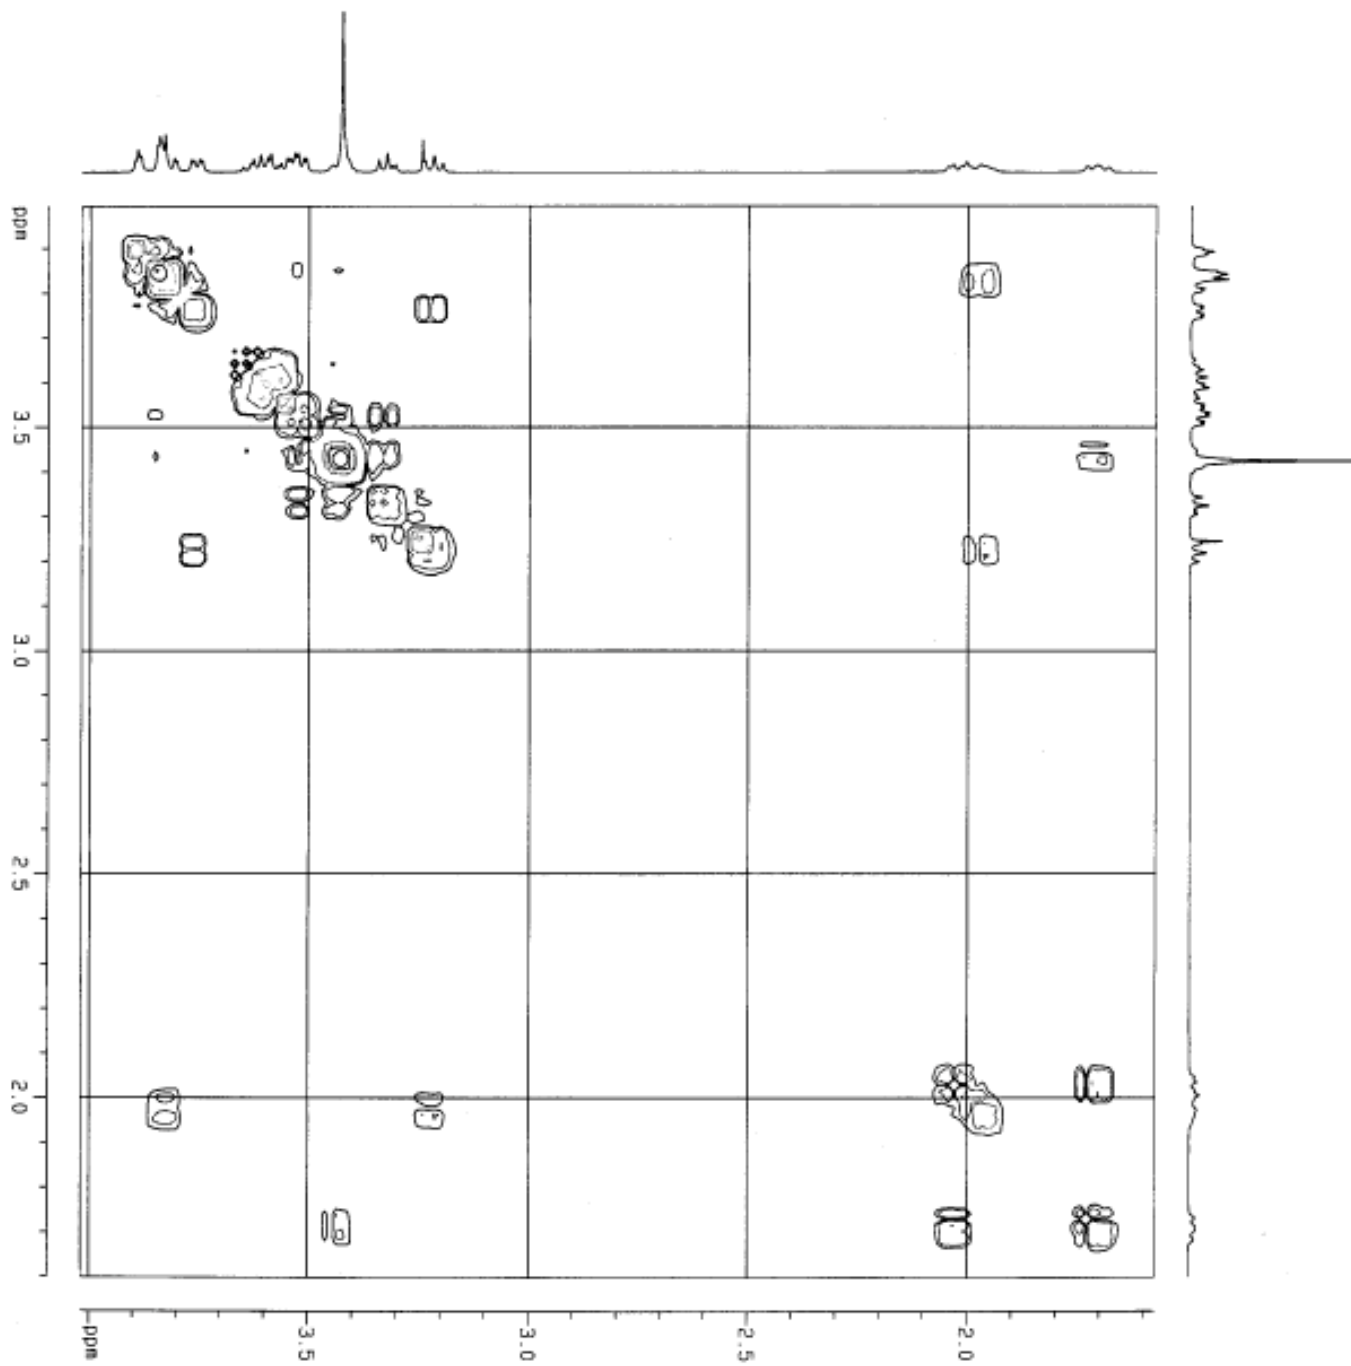

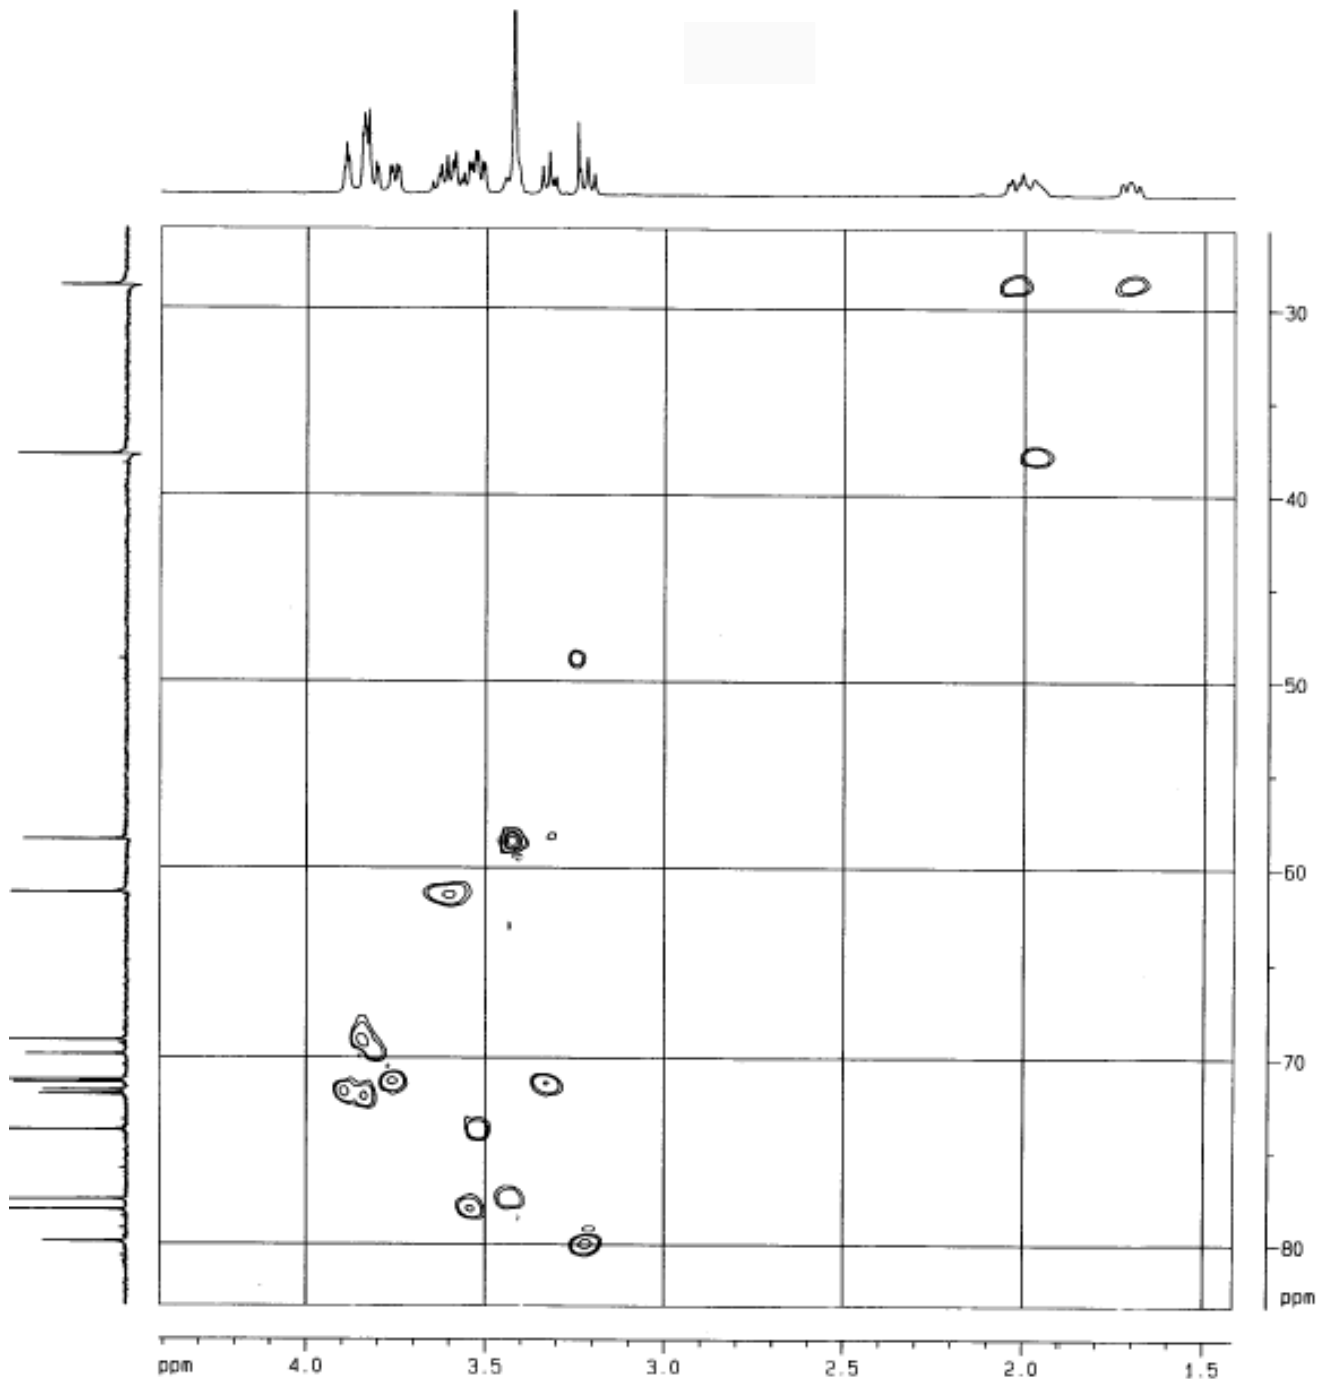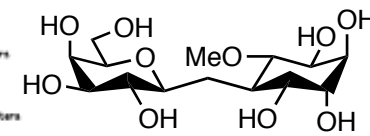

**C-INS-2-OH 3**

```

Current Data Parameters
NAME      2000028
EXPNO    7
PROCNO   1

F2 - Acquisition Parameters
Date_     20080308
Time      18.58
INSTRUM   spect
PROBHD    5 mm CPXCI 13C
PULPROG   zgpg30
TD        65536
SOLVENT   DMSO
NS        2
DS        16
SWH        8000.000 Hz
F2FREQ    5.5640170
AQ        0.0180290 sec
RG        38200.4
SR        19.000 MHz
DE        6.00 MHz
TE        303.2 K
CQF2      145.0000000
DE        0.0000000 MHz
DI        1.0000000 sec
DQ        0.0017045 sec
d11       0.0000000 sec
d12       0.0000000 sec
d15       0.0000000 sec
DELTA1A   0.0010000 sec
DELTA1B   0.0007100 sec
LNO       0.0000000 sec
ACQRES    0.0000000 sec
AQCRES    0.0000001 sec
STRTPT    64

***** CHANNEL f1 *****
NUC1       13C
P1         9.25 MHz
PR         18.50 MHz
PL1        0.00 dB
PL2        0.00 dB
PL3        0.00 dB
PL4        0.00 dB
PL5        0.00 dB
PL6        0.00 dB
PL7        0.00 dB
PL8        0.00 dB
PL9        0.00 dB
PL10       0.00 dB
PL11       0.00 dB
PL12       0.00 dB
PL13       0.00 dB
PL14       0.00 dB
PL15       0.00 dB
PL16       0.00 dB
PL17       0.00 dB
PL18       0.00 dB
PL19       0.00 dB
PL20       0.00 dB
PL21       0.00 dB
PL22       0.00 dB
PL23       0.00 dB
PL24       0.00 dB
PL25       0.00 dB
PL26       0.00 dB
PL27       0.00 dB
PL28       0.00 dB
PL29       0.00 dB
PL30       0.00 dB
PL31       0.00 dB
PL32       0.00 dB
PL33       0.00 dB
PL34       0.00 dB
PL35       0.00 dB
PL36       0.00 dB
PL37       0.00 dB
PL38       0.00 dB
PL39       0.00 dB
PL40       0.00 dB
PL41       0.00 dB
PL42       0.00 dB
PL43       0.00 dB
PL44       0.00 dB
PL45       0.00 dB
PL46       0.00 dB
PL47       0.00 dB
PL48       0.00 dB
PL49       0.00 dB
PL50       0.00 dB
PL51       0.00 dB
PL52       0.00 dB
PL53       0.00 dB
PL54       0.00 dB
PL55       0.00 dB
PL56       0.00 dB
PL57       0.00 dB
PL58       0.00 dB
PL59       0.00 dB
PL60       0.00 dB
PL61       0.00 dB
PL62       0.00 dB
PL63       0.00 dB
PL64       0.00 dB
PL65       0.00 dB
PL66       0.00 dB
PL67       0.00 dB
PL68       0.00 dB
PL69       0.00 dB
PL70       0.00 dB
PL71       0.00 dB
PL72       0.00 dB
PL73       0.00 dB
PL74       0.00 dB
PL75       0.00 dB
PL76       0.00 dB
PL77       0.00 dB
PL78       0.00 dB
PL79       0.00 dB
PL80       0.00 dB
PL81       0.00 dB
PL82       0.00 dB
PL83       0.00 dB
PL84       0.00 dB
PL85       0.00 dB
PL86       0.00 dB
PL87       0.00 dB
PL88       0.00 dB
PL89       0.00 dB
PL90       0.00 dB
PL91       0.00 dB
PL92       0.00 dB
PL93       0.00 dB
PL94       0.00 dB
PL95       0.00 dB
PL96       0.00 dB
PL97       0.00 dB
PL98       0.00 dB
PL99       0.00 dB
PL100      0.00 dB

***** CHANNEL f2 *****
CPDPRG2   gpcp
NUC2       13C
P2         9.25 MHz
PR         18.50 MHz
PL2        0.00 dB
PL3        0.00 dB
PL4        0.00 dB
PL5        0.00 dB
PL6        0.00 dB
PL7        0.00 dB
PL8        0.00 dB
PL9        0.00 dB
PL10       0.00 dB
PL11       0.00 dB
PL12       0.00 dB
PL13       0.00 dB
PL14       0.00 dB
PL15       0.00 dB
PL16       0.00 dB
PL17       0.00 dB
PL18       0.00 dB
PL19       0.00 dB
PL20       0.00 dB
PL21       0.00 dB
PL22       0.00 dB
PL23       0.00 dB
PL24       0.00 dB
PL25       0.00 dB
PL26       0.00 dB
PL27       0.00 dB
PL28       0.00 dB
PL29       0.00 dB
PL30       0.00 dB
PL31       0.00 dB
PL32       0.00 dB
PL33       0.00 dB
PL34       0.00 dB
PL35       0.00 dB
PL36       0.00 dB
PL37       0.00 dB
PL38       0.00 dB
PL39       0.00 dB
PL40       0.00 dB
PL41       0.00 dB
PL42       0.00 dB
PL43       0.00 dB
PL44       0.00 dB
PL45       0.00 dB
PL46       0.00 dB
PL47       0.00 dB
PL48       0.00 dB
PL49       0.00 dB
PL50       0.00 dB
PL51       0.00 dB
PL52       0.00 dB
PL53       0.00 dB
PL54       0.00 dB
PL55       0.00 dB
PL56       0.00 dB
PL57       0.00 dB
PL58       0.00 dB
PL59       0.00 dB
PL60       0.00 dB
PL61       0.00 dB
PL62       0.00 dB
PL63       0.00 dB
PL64       0.00 dB
PL65       0.00 dB
PL66       0.00 dB
PL67       0.00 dB
PL68       0.00 dB
PL69       0.00 dB
PL70       0.00 dB
PL71       0.00 dB
PL72       0.00 dB
PL73       0.00 dB
PL74       0.00 dB
PL75       0.00 dB
PL76       0.00 dB
PL77       0.00 dB
PL78       0.00 dB
PL79       0.00 dB
PL80       0.00 dB
PL81       0.00 dB
PL82       0.00 dB
PL83       0.00 dB
PL84       0.00 dB
PL85       0.00 dB
PL86       0.00 dB
PL87       0.00 dB
PL88       0.00 dB
PL89       0.00 dB
PL90       0.00 dB
PL91       0.00 dB
PL92       0.00 dB
PL93       0.00 dB
PL94       0.00 dB
PL95       0.00 dB
PL96       0.00 dB
PL97       0.00 dB
PL98       0.00 dB
PL99       0.00 dB
PL100      0.00 dB

***** CHANNEL f3 *****
NAME      2000028
EXPNO    7
PROCNO   1

F1 - Acquisition parameters
NUC       13C
TD        65536
SOLVENT   DMSO
NS        2
DS        16
SWH        8000.000 Hz
F2FREQ    5.5640170
AQ        0.0180290 sec
RG        38200.4
SR        19.000 MHz
DE        6.00 MHz
TE        303.2 K
CQF1      145.0000000
DE        0.0000000 MHz
DI        1.0000000 sec
DQ        0.0017045 sec
d11       0.0000000 sec
d12       0.0000000 sec
d15       0.0000000 sec
DELTA1A   0.0010000 sec
DELTA1B   0.0007100 sec
LNO       0.0000000 sec
ACQRES    0.0000000 sec
AQCRES    0.0000001 sec
STRTPT    64

F2 - Processing parameters
SI        32768
SF        500.136000 MHz
WDW       EM
SSB       0
GB        0
PC        1.40

F3 - Processing parameters
SI        32768
SF        125.761700 MHz
WDW       EM
SSB       0
GB        0
PC        1.40

2D NMR parameters
CQ2      125.761700 MHz
CQ1      125.761700 MHz
SF        500.136000 MHz
WDW       EM
SSB       0
GB        0
PC        1.40
F2FREQ    5.5640170 MHz
F1FREQ    125.761700 MHz
F2AQ      0.0180290 sec
F1AQ      0.0180290 sec
F2RG      38200.4
F1RG      38200.4
F2SR      19.000 MHz
F1SR      125.761700 MHz
F2DE      6.00 MHz
F1DE      6.00 MHz
F2TE      303.2 K
F1TE      303.2 K
F2CQF2    145.0000000 MHz
F1CQF2    145.0000000 MHz
F2DE      0.0000000 MHz
F1DE      0.0000000 MHz
F2DI      1.0000000 sec
F1DI      1.0000000 sec
F2DQ      0.0017045 sec
F1DQ      0.0017045 sec
F2d11     0.0000000 sec
F1d11     0.0000000 sec
F2d12     0.0000000 sec
F1d12     0.0000000 sec
F2DELTA1A 0.0010000 sec
F1DELTA1A 0.0010000 sec
F2DELTA1B 0.0007100 sec
F1DELTA1B 0.0007100 sec
F2LNO     0.0000000 sec
F1LNO     0.0000000 sec
F2ACQRES  0.0000000 sec
F1ACQRES  0.0000000 sec
F2AQCRES  0.0000001 sec
F1AQCRES  0.0000001 sec
F2STRTPT  64
F1STRTPT  64

```

## INS-2 / PP2C $\alpha$

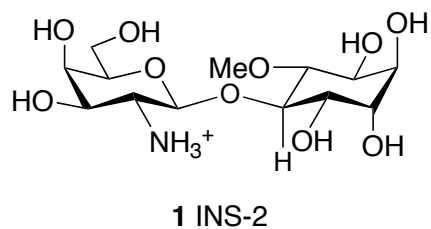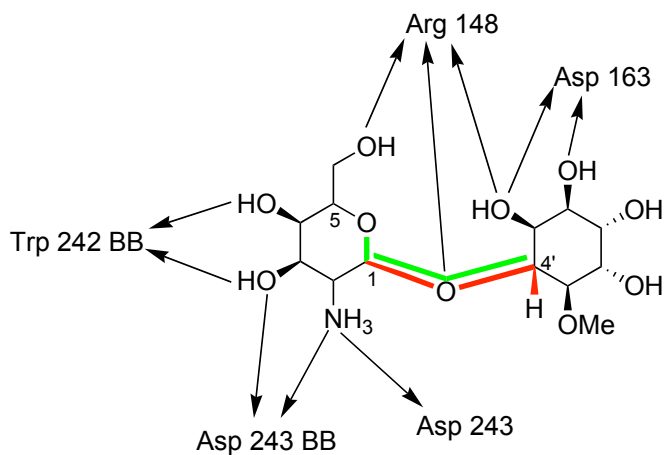

Intersaccharide torsions

$$C1-O-C4'-H4' = +63.7$$

$$O5-C1-O-C4' = +270.0$$

## C-INS-2 / PP2C $\alpha$

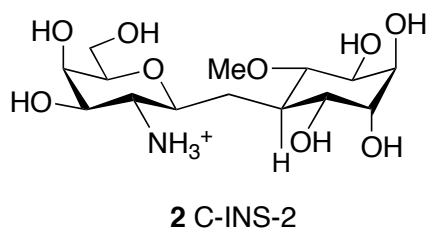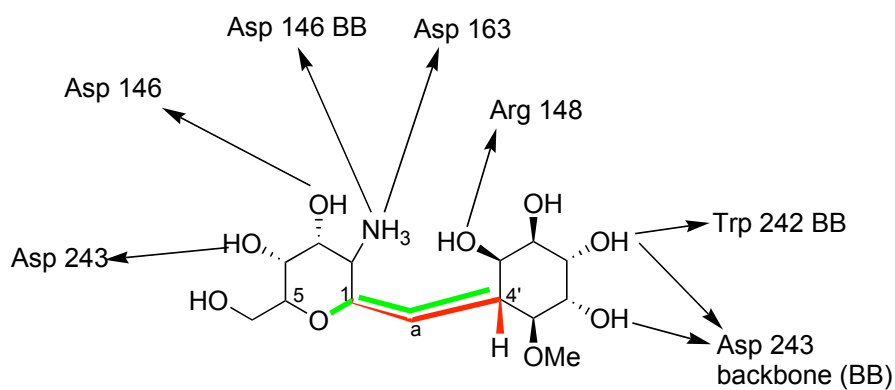

Intersaccharide torsions

$$C1-Ca-C4'-H4' = +210$$

$$O5-C1-Ca-C4' = +300.0$$

## INS-2 / PDHP

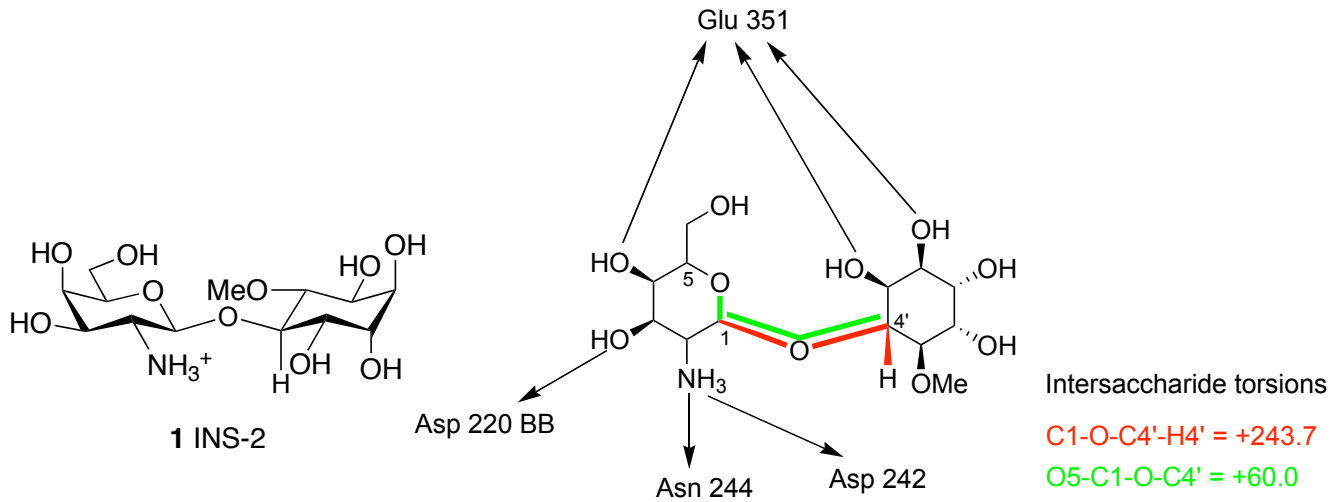

## C-INS-2 / PDHP

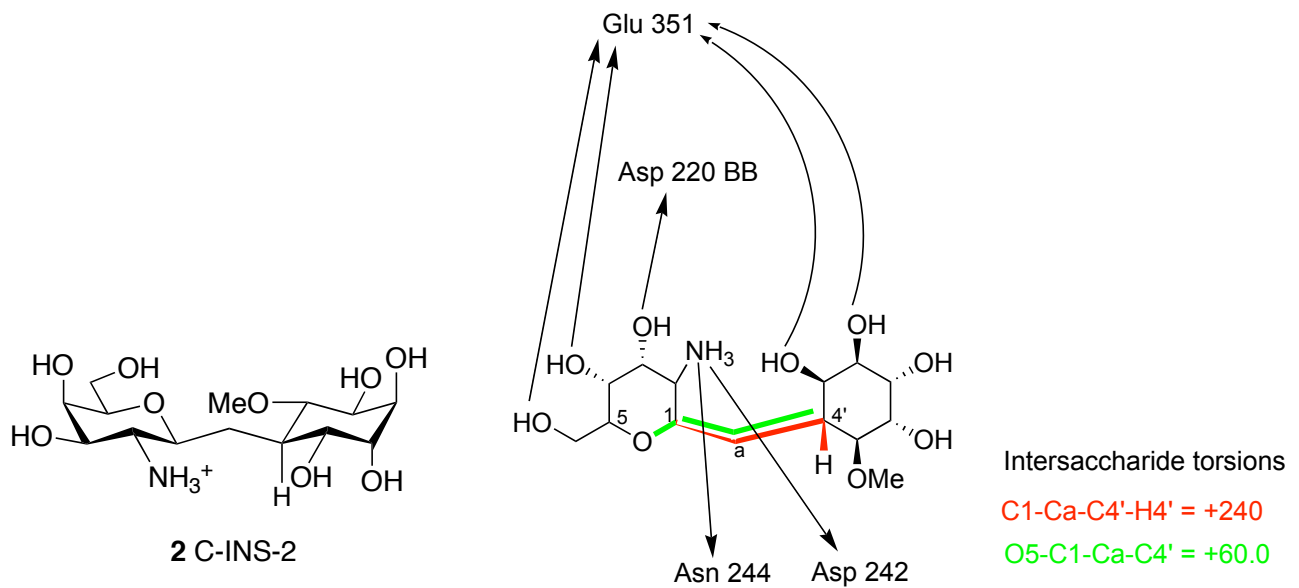

| Compound | Protein |        |         |           |         |
|----------|---------|--------|---------|-----------|---------|
| INS-2    | PDHP    |        |         |           |         |
| #        | D-score | PMF    | G-score | Chemscore | C-score |
| 9        | -150.98 | -89.1  | -164.66 | -14.94    | 5       |
| 5        | -148.67 | -92.73 | -161.87 | -15.71    | 5       |
| 3        | -76.99  | -78.12 | -166.27 | -19.45    | 4       |
| 4        | -78.88  | -77.05 | -161.62 | -19.45    | 4       |
| 16       | -153.12 | -82.34 | -154.71 | -15.1     | 4       |
| 1        | -68.28  | -72.51 | -177.4  | -14.43    | 3       |
| 2        | -69.33  | -70.08 | -173.37 | -16.22    | 3       |
| 6        | -71.4   | -71.65 | -166.53 | -16.81    | 3       |
| 7        | -72.52  | -70.34 | -164.95 | -16.68    | 3       |
| 11       | -97.07  | -69.13 | -158.18 | -15.51    | 3       |

| Compound | Protein |        |         |           |         |
|----------|---------|--------|---------|-----------|---------|
| C-INS-2  | PDHP    |        |         |           |         |
| #        | D-score | PMF    | G-score | Chemscore | C-score |
| 11       | -140.04 | -78.86 | -176.11 | -20.27    | 4       |
| 1        | -82.91  | -70.55 | -189.08 | -24.76    | 4       |
| 28       | -140    | -67.16 | -157.91 | -16.5     | 3       |
| 20       | -84.83  | -64.62 | -203.05 | -20.53    | 3       |
| 19       | -84.11  | -64.6  | -201.93 | -20.53    | 3       |
| 3        | -79.56  | -70.44 | -187.85 | -20.71    | 3       |
| 18       | -92.9   | -66.3  | -183.17 | -19.22    | 2       |
| 9        | -86.51  | -66.71 | -204.87 | -18.99    | 2       |
| 7        | -76.18  | -70.3  | -164.16 | -17.18    | 2       |
| 13       | -75.76  | -68.48 | -157.13 | -18.58    | 2       |

| Compound | Protein |        |         |           |         |
|----------|---------|--------|---------|-----------|---------|
| INS-2    | PP2C    |        |         |           |         |
| #        | D-score | PMF    | G-score | Chemscore | C-score |
| 1        | -112.09 | -49.56 | -113.55 | -13.31    | 5       |
| 2        | -105.23 | -47.14 | -108.63 | -12.99    | 5       |
| 3        | -124.46 | -57.53 | -143.23 | -11.5     | 4       |
| 6        | -100.2  | -46.54 | -127.09 | -9.89     | 4       |
| 4        | -100.07 | -48.23 | -118.44 | -9.9      | 4       |
| 7        | -75.16  | -49.26 | -110.95 | -12.82    | 4       |
| 14       | -105.6  | -45.81 | -136.61 | -9.4      | 3       |
| 12       | -106.14 | -47.85 | -134.99 | -8.57     | 3       |
| 13       | -112.39 | -49.73 | -132.54 | -9.62     | 3       |
| 27       | -78.34  | -47.29 | -121.75 | -12.16    | 3       |



| Compound | Protein |         |         |           |         |  |
|----------|---------|---------|---------|-----------|---------|--|
| C-INS-2  | PP2C    |         |         |           |         |  |
| #        | D-score | PMF     | G-score | Chemscore | C-score |  |
| 3        | .138.63 | -76.8   | -181.3  | -22.25    | 4       |  |
| 11       | -148.27 | -54.26  | -174.01 | -22.2     | 4       |  |
| 5        | -138.35 | -70.09  | -173.06 | -18.99    | 4       |  |
| 6        | -147.32 | -67.03  | -172.31 | -18.84    | 4       |  |
| 7        | -159.73 | -122.37 | -153.37 | -16.49    | 4       |  |
| 9        | -150.05 | -118.65 | -148.53 | -16.53    | 4       |  |
| 19       | -178.87 | -137.69 | -184.77 | -13.83    | 3       |  |
| 10       | -138.96 | -70.16  | -172.78 | -18.1     | 3       |  |
| 4        | -134.37 | -72.75  | -166.34 | -23.44    | 3       |  |
| 8        | -129.4  | -69.25  | -167.35 | -19.93    | 3       |  |

| Compound   | Protein |         |         |           |         |  |
|------------|---------|---------|---------|-----------|---------|--|
| C-INS-2-OH | PDHP    |         |         |           |         |  |
| #          | D-score | PMF     | G-score | Chemscore | C-score |  |
| 10         | -142.38 | -84.6   | -132.27 | -15.47    | 5       |  |
| 20         | -131.09 | -66.89  | -145.72 | -16.43    | 4       |  |
| 4          | -128.97 | -29.67  | -141.88 | -15.05    | 4       |  |
| 19         | -146.21 | -79.93  | -138.5  | -15.22    | 4       |  |
| 3          | -123.45 | -62.72  | -136.04 | -15.46    | 4       |  |
| 2          | -124.82 | -60.05  | -135.04 | -16.42    | 4       |  |
| 1          | -89.47  | -46.22  | -135.44 | -17.29    | 3       |  |
| 8          | -90.62  | -75.73  | -133.73 | -8.47     | 3       |  |
| 9          | -89.73  | -75.53  | -128.27 | -11.16    | 3       |  |
| 25         | -165.72 | -100.27 | -96.39  | -14.26    | 3       |  |

| Compound   | Protein |        |         |           |         |  |
|------------|---------|--------|---------|-----------|---------|--|
| C-INS-2-OH | PP2C    |        |         |           |         |  |
| #          | D-score | PMF    | G-score | Chemscore | C-score |  |
| 1          | -127.56 | -65.27 | -154.89 | -17.98    | 5       |  |
| 10         | -141.16 | -62.76 | -153.02 | -21.32    | 4       |  |
| 18         | -116.05 | -72.64 | -122.15 | -17.5     | 4       |  |
| 14         | -127.66 | -82.38 | -161.29 | -10.64    | 3       |  |
| 19         | -117.88 | -87.04 | -145.18 | -10.03    | 3       |  |
| 3          | -93.6   | -43.58 | -121.2  | -20.06    | 3       |  |
| 12         | -95.31  | -64.84 | -116.56 | -17.23    | 3       |  |
| 11         | -95.13  | -64.36 | -116.55 | -17.23    | 3       |  |
| 2          | -93.11  | -67.03 | -108.63 | -18.77    | 3       |  |
| 6          | -63.53  | -31.34 | -78.56  | -16.62    | 2       |  |
